# Supplementary material for: Retrospective cohort study to evaluate medication use in patients hospitalised with COVID-19 in Scotland: protocol for a national observational study
Source: PubMed Central journal article supplement (PMC8609490; doi:10.1136/bmjopen-2021-054861), 2021-11-19
Supplement: bmjopen-2021-054861.draft_revisions.pdf [file bmjopen-2021-054861.draft_revisions.pdf]

# BMJ Open

BMJ Open is committed to open peer review. As part of this commitment we make the peer review history of every article we publish publicly available.

When an article is published we post the peer reviewers' comments and the authors' responses online. We also post the versions of the paper that were used during peer review. These are the versions that the peer review comments apply to.

The versions of the paper that follow are the versions that were submitted during the peer review process. They are not the versions of record or the final published versions. They should not be cited or distributed as the published version of this manuscript.

BMJ Open is an open access journal and the full, final, typeset and author-corrected version of record of the manuscript is available on our site with no access controls, subscription charges or pay-per-view fees (<http://bmjopen.bmj.com>).

If you have any questions on BMJ Open's open peer review process please email [info.bmjopen@bmj.com](mailto:info.bmjopen@bmj.com)

# BMJ Open

## Retrospective cohort study to evaluate medication use in patients hospitalised with COVID-19 in Scotland: protocol for a national observational study

|                               |                                                                                                                                                                                                                                                                                                                                                                                                                                                                                                                                                                                                                                                                                                                                                                                                                                                                                                                                                                                                          |
|-------------------------------|----------------------------------------------------------------------------------------------------------------------------------------------------------------------------------------------------------------------------------------------------------------------------------------------------------------------------------------------------------------------------------------------------------------------------------------------------------------------------------------------------------------------------------------------------------------------------------------------------------------------------------------------------------------------------------------------------------------------------------------------------------------------------------------------------------------------------------------------------------------------------------------------------------------------------------------------------------------------------------------------------------|
| Journal:                      | <i>BMJ Open</i>                                                                                                                                                                                                                                                                                                                                                                                                                                                                                                                                                                                                                                                                                                                                                                                                                                                                                                                                                                                          |
| Manuscript ID                 | bmjopen-2021-054861                                                                                                                                                                                                                                                                                                                                                                                                                                                                                                                                                                                                                                                                                                                                                                                                                                                                                                                                                                                      |
| Article Type:                 | Protocol                                                                                                                                                                                                                                                                                                                                                                                                                                                                                                                                                                                                                                                                                                                                                                                                                                                                                                                                                                                                 |
| Date Submitted by the Author: | 24-Jun-2021                                                                                                                                                                                                                                                                                                                                                                                                                                                                                                                                                                                                                                                                                                                                                                                                                                                                                                                                                                                              |
| Complete List of Authors:     | Mueller, Tanja; University of Strathclyde, Strathclyde Institute of Pharmacy and Biomedical Sciences; Public Health Scotland Glasgow Office<br>Kerr, Steven; The University of Edinburgh, Usher Institute<br>McTaggart, Stuart; Public Health Scotland<br>Kurdi, Amanj; University of Strathclyde, Strathclyde Institute of Pharmacy and Biomedical Sciences; Public Health Scotland Glasgow Office<br>Vasileiou, Eleftheria; The University of Edinburgh, Usher Institute<br>Docherty, Annemarie; The University of Edinburgh, Usher Institute<br>Fraser, Kenny; Triscribe Limited<br>Shi, Ting; The University of Edinburgh, Usher Institute<br>Simpson, Colin; Victoria University of Wellington, School of Health, Wellington Faculty of Health; The University of Edinburgh, Usher Institute<br>Bennie, Marion; University of Strathclyde, Institute of Pharmacy and Biomedical Sciences; Public Health Scotland<br>Sheikh, Aziz; The University of Edinburgh, Usher Institute; HDR UK, BREATHE Hub |
| Keywords:                     | COVID-19, THERAPEUTICS, CLINICAL PHARMACOLOGY                                                                                                                                                                                                                                                                                                                                                                                                                                                                                                                                                                                                                                                                                                                                                                                                                                                                                                                                                            |
|                               |                                                                                                                                                                                                                                                                                                                                                                                                                                                                                                                                                                                                                                                                                                                                                                                                                                                                                                                                                                                                          |

SCHOLARONE™  
Manuscripts

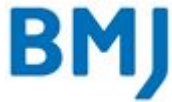

I, the Submitting Author has the right to grant and does grant on behalf of all authors of the Work (as defined in the below author licence), an exclusive licence and/or a non-exclusive licence for contributions from authors who are: i) UK Crown employees; ii) where BMJ has agreed a CC-BY licence shall apply, and/or iii) in accordance with the terms applicable for US Federal Government officers or employees acting as part of their official duties; on a worldwide, perpetual, irrevocable, royalty-free basis to BMJ Publishing Group Ltd ("BMJ") its licensees and where the relevant Journal is co-owned by BMJ to the co-owners of the Journal, to publish the Work in this journal and any other BMJ products and to exploit all rights, as set out in our [licence](#).

The Submitting Author accepts and understands that any supply made under these terms is made by BMJ to the Submitting Author unless you are acting as an employee on behalf of your employer or a postgraduate student of an affiliated institution which is paying any applicable article publishing charge ("APC") for Open Access articles. Where the Submitting Author wishes to make the Work available on an Open Access basis (and intends to pay the relevant APC), the terms of reuse of such Open Access shall be governed by a Creative Commons licence – details of these licences and which [Creative Commons](#) licence will apply to this Work are set out in our licence referred to above.

Other than as permitted in any relevant BMJ Author's Self Archiving Policies, I confirm this Work has not been accepted for publication elsewhere, is not being considered for publication elsewhere and does not duplicate material already published. I confirm all authors consent to publication of this Work and authorise the granting of this licence.

# Retrospective cohort study to evaluate medication use in patients hospitalised with COVID-19 in Scotland: protocol for a national observational study

## Authors

Tanja Mueller<sup>1,2</sup>, Steven Kerr<sup>3</sup>, Stuart McTaggart<sup>4</sup>, Amanj Kurdi<sup>1,2</sup>, Eleftheria Vasileiou<sup>3</sup>, Annemarie Docherty<sup>3</sup>, Kenny Fraser<sup>5</sup>, Ting Shi<sup>3</sup>, Colin R Simpson<sup>3,6</sup>, Marion Bennie<sup>1,4</sup>, Aziz Sheikh<sup>3,7</sup>

## Affiliations

<sup>1</sup>Strathclyde Institute of Pharmacy and Biomedical Sciences, University of Strathclyde, Glasgow, UK

<sup>2</sup>Public Health Scotland, Glasgow, UK

<sup>3</sup>Usher Institute, University of Edinburgh, Edinburgh, UK

<sup>4</sup>Public Health Scotland, Edinburgh, UK

<sup>5</sup>Triscribe Ltd, Glasgow, UK

<sup>6</sup>School of Health, Wellington Faculty of Health, Victoria University of Wellington, Wellington, NZ

<sup>7</sup>HDR UK BREATHE Hub, Edinburgh, UK

## Corresponding author

Tanja Mueller, Strathclyde Institute of Pharmacy and Biomedical Sciences, University of Strathclyde, 161 Cathedral Street, Glasgow G4 0RE, UK; email [tanja.muller@strath.ac.uk](mailto:tanja.muller@strath.ac.uk)

## ORCID

Tanja Mueller: 0000-0002-0418-4789

Amanj Kurdi: 0000-0001-5036-1988

Eleftheria Vasileiou: 0000-0001-6850-7578

Annemarie Docherty: 0000-0001-8277-420X

Ting Shi: 0000-0002-4101-4535

Colin Simpson: 0000-0002-5194-8083

Marion Bennie: 0000-0002-4046-629x

Aziz Sheikh: 0000-0001-7022-3056

**Key words:** COVID-19, hospital treatment, drug utilisation, dexamethasone, remdesivir, tocilizumab

**Word count:** abstract 291; main text 2376 (excluding abstract, tables and references)

## Abstract

**Introduction:** Coronavirus disease 2019 (COVID-19) has caused millions of hospitalisations and deaths globally. A range of vaccines have been developed and are being deployed at scale in the UK to prevent SARS-CoV-2 infection, which have reduced risk of infection and severe COVID-19 outcomes. Those with COVID-19 are now being treated with several repurposed drugs based on evidence emerging from recent clinical trials. However, there is currently limited real-world data available related to the use of these drugs in routine clinical practice. The purpose of this study is to address the prevailing knowledge gaps regarding the use of dexamethasone, remdesivir, and tocilizumab by conducting an exploratory drug utilisation study, aimed at providing in-depth descriptions of patients receiving these drugs as well as the treatment patterns observed in Scotland.

**Methods and analysis:** Retrospective cohort study, comprising adult patients admitted to hospital with confirmed or suspected COVID-19 across five Scottish Health Boards using data from in-hospital ePrescribing linked to the Early Estimation of Vaccine and Anti-Viral Effectiveness (EAVE II) COVID-19 surveillance platform. The primary outcome will be exposure to the medicines of interest (dexamethasone, remdesivir, tocilizumab), either alone or in combination; exposure will be described in terms of drug(s) of choice; prescribed and administered dose; treatment duration; and any changes in treatment, e.g. dose escalation and/or switching to an alternative drug. Analyses will primarily be descriptive in nature.

**Ethics and dissemination:** Ethical and information governance approvals have been obtained by the National Research Ethics Service Committee, South East Scotland 02, and the Public Benefit and Privacy Panel for Health and Social Care, respectively. Findings from this study will be presented at academic and clinical conferences, and to the funders and other interested parties as appropriate; study findings will also be published in peer-reviewed journals.

### Strengths and limitations of this study

- This study will use data collected as part of routine care to address prevailing knowledge gaps with regards to the treatment of hospitalised COVID-19 patients.
- In-patient electronic prescribing data will be linked with a wide range of other datasets, enabling an in-depth description of current clinical practice in Scotland.
- Analyses will be descriptive in nature; causal analyses will be outwith the scope of this study due to its observational nature.

## INTRODUCTION

Since first appearing in Wuhan, China, in late 2019, the new “severe acute respiratory syndrome coronavirus 2” (SARS-CoV-2) has spread globally, resulting in the World Health Organization (WHO) first declaring a Public Health Emergency of International Concern and then, in March 2020, a pandemic.[1] The disease caused by SARS-CoV-2 is now widely known as “coronavirus disease 2019”, or COVID-19.

Early symptoms of COVID-19 tend to occur between 5 – 10 days after infection, and commonly include fever, loss of smell and/or taste, and a persistent cough.[2] Symptoms may become increasingly severe over a period of approximately two weeks, and can lead to hospitalisation mainly due to breathing problems; patients with severe disease frequently require mechanical ventilation.[3] COVID-19 potentially leads to organ damage, and can result in long-term health problems (“long COVID”).[4] Disease outcomes generally appear to be linked to age and pre-existing conditions, including cardiovascular diseases and diabetes.[5]

A number of COVID-19 vaccines have been developed and are now being successfully deployed at scale in the UK.[6,7] Furthermore, while the condition itself is self-limiting in the majority of cases, a range of repurposed drugs are currently being used to alleviate symptoms and/or decrease mortality in hospitalised COVID-19 patients, mostly based on evidence emerging from clinical trials – including, e.g., antiviral drugs that have previously been tested in conditions caused by similar viruses such as SARS or MERS (Middle East respiratory syndrome) or other viral infections such as HIV or Ebola;[8,9] anti-inflammatory drugs including corticosteroids[10] and monoclonal antibodies;[11–14] and a raft of other drugs, from antibiotics[15] to interferons.[16] In addition, convalescent plasma therapy has been proposed.[17]

With interest in this area remaining high, new study results being reported on a frequent basis, and several clinical trials still ongoing, treatment recommendations are rapidly updated;[18] therefore, treatment guidelines – and, consequently, clinical practice – are likely to differ substantially, both across countries and over time. For instance, a recent multi-national cohort study has investigated the use of repurposed and adjuvant drugs in hospitalised COVID-19 patients in China, South Korea, Spain, and the United States, and found that azithromycin, the antivirals lopinavir and ritonavir, and the anti-malaria drug hydroxychloroquine were frequently used at the beginning of the pandemic; however, following reports of the non-effectiveness of these drugs in combination with safety issues related to

1  
2  
3 hydroxychloroquine, their use has declined, and dexamethasone and remdesivir use have instead been  
4 increasing. In addition, use patterns differed considerably between these countries.[19]

5  
6  
7 Dexamethasone,[20] remdesivir,[21] and tocilizumab[22] have been recommended for use in  
8 hospitalised patients with severe COVID-19 within the UK based on randomised controlled trial  
9 evidence, most prominently the RECOVERY trial.[23] There is, however, currently limited real-world  
10 evidence available related to the use of these drugs in routine clinical practice. For instance, it is thus far  
11 unclear which patients are being prescribed dexamethasone, remdesivir, and/or tocilizumab as part of  
12 their in-hospital treatment, and at what point; what the most common treatment patterns are; how the  
13 use of these drugs has changed since the start of the pandemic; and whether there are any geographical  
14 differences observable. Further evidence on the real-world clinical effectiveness and safety of these  
15 drugs is also required.[24]

16  
17  
18 There have been few published studies of in-hospital drug utilisation. This has been due, in part, to  
19 patient-level data being unavailable as drug prescribing and administration records are paper-based in  
20 many secondary care settings.[25] The implementation of electronic prescribing in hospitals in Scotland  
21 has simplified data sharing across health care settings. The wider roll-out of the “Hospital Electronic  
22 Prescribing and Medicines Administration” (HEPMA) system was initiated in 2014[26] in line with the  
23 Scottish eHealth strategy,[27] and HEPMA is now available to hospitals across five out of the 14 Health  
24 Boards in Scotland (regional organisations responsible for delivering health care to their respective  
25 populations).[28]

26  
27  
28 Our aim is to contribute to addressing the prevailing knowledge gaps by conducting an exploratory drug  
29 utilisation study using data from in-hospital ePrescribing linked to the Early Estimation of Vaccine and  
30 Anti-Viral Effectiveness (EAVE II) COVID-19 surveillance platform.[24] This linked data will be analysed to  
31 provide an in-depth description of the treatments hospitalised COVID-19 patients receive (whether  
32 alone or in combination), and to describe the outcomes in these patients. The drugs of interest include  
33 dexamethasone, remdesivir, and tocilizumab, based on information requests by clinicians working in this  
34 setting; these drugs are currently routinely used in patients hospitalised with COVID-19 in Scotland due  
35 to recent treatment recommendations.



### Primary objectives

- Identify patients being treated with dexamethasone, remdesivir, and/or tocilizumab (either as monotherapy or in combination) for COVID-19 after being admitted to hospital as part of standard care;
- Describe and summarise baseline characteristics of these patients, including COVID-19 status (suspected at hospital admission based on symptoms, vs confirmed via polymerase chain reaction (PCR) test); socio-demographics (age; sex; Health Board; deprivation; hospital type; admission from care home; hospital readmission); and clinical variables potentially related to treatment choice and/or possible outcomes (including, but not restricted to, comorbidities,[29] concomitant medication, and Intensive Care Unit (ICU) admission);
- Describe treatment patterns, including drug chosen and dose administered; treatment duration; dose escalations; and changes in the drug given (e.g. switching from dexamethasone to hydrocortisone or methylprednisolone);
- Describe patterns of medicines use over time and across geographical areas, and potentially by patient characteristic as and when appropriate;
- Map out patient pathways and describe admission episodes and their outcomes (hospital admission details and duration of in-hospital stay, ICU transferal, administration of dexamethasone or any other drug of interest, discharge or death); potentially stratified by patient characteristics as and when appropriate.

### Secondary objective

- Evaluate the impact of guideline changes on the patterns of use of dexamethasone, remdesivir, and tocilizumab over time.

## METHODS AND ANALYSIS

### Study design

Retrospective cohort study, comprising adult patients (18 years of age or older) admitted to hospital with confirmed or suspected COVID-19 across five Scottish Health Boards: NHS Ayrshire & Arran, NHS

1  
2  
3 Dumfries & Galloway, NHS Forth Valley, NHS Lanarkshire, and NHS Lothian. The total population size of  
4 these Health Boards was approximately 2.4m people (~45% of the Scottish population) in mid-2019.[30]  
5  
6 However, since implementation of HEPMA in NHS Lothian happened later than in the other Health  
7  
8 Boards, data might not be as complete, particularly for the early months of the study period.  
9

## 10 **Data sources**

11  
12  
13 The data to be used for this study is part of the EAVE II platform, which has been implemented to  
14 determine COVID-19 related risk factors and the COVID-19 health care burden; and to evaluate the  
15 uptake, safety, and effectiveness of therapeutic interventions.[24] All data have been collected as part  
16 of routine care.  
17  
18

19  
20  
21 The EAVE II data source contains primary health care records, linked with patient-level secondary care  
22 data using the Community Health Index (CHI) number[31] – a unique patient identifier used throughout  
23 the Scottish health system – and comprises the following datasets:  
24

- 25  
26 ● COVID-19 test results: Electronic Communication of Surveillance Scotland (ECOSS)[32]
- 27  
28 ● Vaccination status: Turas Vaccine Management Tool (TVMT),[33] GP extract
- 29  
30 ● Hospital admissions and in-patient episodes: Scottish Morbidity Record (SMR01), Rapid  
31 Preliminary Inpatient Data (RAPID), and Scottish Intensive Care Society Audit Group database  
32 (SICSAG)[34]
- 33  
34 ● In-hospital medicines use and community prescriptions: HEPMA[35] and Prescribing Information  
35 System (PIS)[34], respectively
- 36  
37 ● Mortality: National Records of Scotland (NRS)[34]
- 38  
39  
40  
41  
42  
43

44 HEPMA will be used for identification of the main study outcomes, including medication use patterns; all  
45 available datasets may be used to identify other study outcomes as appropriate and feasible.  
46

47  
48 EAVE II data are held by Public Health Scotland; pseudonymised data will be accessed using the National  
49 Safe Haven, a secure, closed environment.[36]  
50  
51  
52  
53  
54  
55  
56  
57  
58  
59  
60

### Study population

The study population will comprise all adult patients admitted to hospital in the five aforementioned Health Boards since 01.03.2020 with a primary diagnosis of COVID-19, up to the latest date available. COVID-19 hospitalisations will be defined as hospitalisations within 28 days of a positive PCR test, or based on an admission with an ICD-10 code for COVID-19 (U07.1 and U07.2) as recorded in hospital episode records (SMR01 and/or RAPID); ICD-10 diagnoses will be confirmed using available PCR test results (ECOSS) where possible. Hence, the population will include both laboratory confirmed and clinical based diagnosis, respectively.

Patients will be followed up from the index date, defined as the first prescribing date for any of the medications of interest (the exposure), until discharge from hospital, death, or the end of the study period subject to data availability, whichever occurs first.

Patients receiving any of the drugs as part of a clinical trial will be excluded for analyses based on trial participation information if available (e.g. trial flag in HEPMA); or based on the dates where drugs became recommended for use in daily practice as communicated by the Scottish Government/NHS Scotland (see also Table 1 below for details).

### Primary outcome

The primary outcome will be treatment with the medicines of interest, either alone or in combination, with a particular emphasis on dexamethasone as dexamethasone is the most widely used of these drugs, and the availability of both prescribing and administration data is expected to be high. All patients receiving dexamethasone will be included in the first instance; however, analyses will mainly focus on those receiving the recommended dosing regimen for patients with COVID-10 (6mg po or 1.8ml iv, once daily for 10 days)[20] since other dosing regimens are more likely being prescribed for indications other than COVID-19. Alternative recommended corticosteroids such as prednisolone and hydrocortisone will also be considered (recommended doses: 40mg po once daily for 10 days; 50mg iv every eight hours for 10 days, respectively). Remdesivir and tocilizumab will be included for analyses where sufficient data are available; since these two drugs are given intravenously, the data available might be limited (i.e. exclude the exact dose administered).

Exposure will be described in terms of drug(s) of choice; prescribed and administered dose; treatment duration; and any changes in treatment, e.g. dose escalation and/or switching to an alternative drug

1  
2  
3 (including time to dose escalation/switching and reasons for these, if available). The first drug prescribed  
4 on HEPMA following admission to hospital on or after the date of (possible) COVID-19 diagnosis will be  
5 defined as the index drug (i.e. dexamethasone, remdesivir, or tocilizumab); the date of the first recorded  
6 prescription will be used as the index date (for the purpose of setting the baseline). Duration of  
7 treatment will be calculated using the dates of first/last recorded administration of the drug in question.  
8  
9

### 12 **Other outcomes**

14 Additional outcomes relating to the primary study objective include hospital specialty at admission, in-  
15 hospital transfer (e.g. admission to ICU), length of stay, and outcome of hospital episode (discharge or  
16 death).  
17  
18

19 Secondary outcomes include in-hospital mortality, i.e. death on the same day as discharge; and out-of-  
20 hospital mortality following discharge, if feasible.  
21  
22  
23

### 25 **Covariates**

26 Patient characteristics of interest that might potentially influence choice of drug, duration of treatment,  
27 and (possibly) treatment outcomes will be identified and summarised at baseline, and comprise socio-  
28 demographic factors (age, sex, Health Board of residence, level of deprivation); disease-related aspects;  
29 comorbidities; and concomitant medication.  
30  
31  
32  
33  
34

35 The level of deprivation will be characterised using the Scottish Index of Multiple Deprivation (SIMD), an  
36 area index combining information with regards to health, access to services, education, employment,  
37 income, housing, and crime.[37] Disease-related aspects refer to information potentially linked to  
38 disease severity, e.g. level of hospital care/additional treatments received (ICU admission, mechanical  
39 ventilation) if and where available; while O<sub>2</sub> saturation levels would be highly relevant, particularly with  
40 regards to treatment outcomes, this information is not present in the available dataset. Comorbidities of  
41 interest will comprise mainly those conditions used to identify patients at high risk of adverse outcomes  
42 (i.e. shielding list),[29] e.g. respiratory disease (asthma, chronic obstructive pulmonary disease (COPD)),  
43 cardiovascular diseases, diabetes (type 1 and type 2), chronic kidney disease, and cancer; other  
44 comorbidities might also be included. Concomitant medication at baseline will focus on drugs potentially  
45 impacting the immune system and/or affecting the risk of infections (immuno-suppressants, steroids,  
46 antimicrobial drugs), and those with an (hypothesised) effect on disease severity or outcome – either  
47 directly or as a proxy for underlying conditions potentially not captured otherwise within the dataset  
48  
49  
50  
51  
52  
53  
54  
55  
56  
57  
58  
59  
60

(e.g. long-acting muscarinic antagonists (LAMA)/long acting beta-agonists (LABA), insulin and anti-diabetic drugs, anticoagulants, antiplatelet drugs, angiotensin-converting enzyme (ACE) inhibitors, angiotensin receptor blockers (ARBs)). If possible, COVID-19 vaccination status of patients will also be assessed. Furthermore, the presence of polypharmacy – defined as the simultaneous use of five or more different medications prior to being admitted to hospital – will be identified.

Baseline characteristics will be defined using all available data, with restrictions on included time periods (mainly with regards to concomitant medication) based on the specifications used in previous studies.[5,6,24]

Exposure, outcome, and relevant covariates – alongside the data source, their coding, and a brief description – are presented in table 1.

**Table 1: Description of variables (cohort identification, outcomes, covariates)**

| Variable                               | Data source     | Description                                                   | Value                                        |
|----------------------------------------|-----------------|---------------------------------------------------------------|----------------------------------------------|
| <b>Cohort: COVID-19 status</b>         |                 |                                                               |                                              |
| Cause of admission                     | SMR01/<br>RAPID | Suspected or confirmed                                        | ICD10 codes: U07.1, U07.2                    |
| PCR test result                        | ECOSS           | COVID-19 test result (within 28 days prior to admission)      | Categorical: Positive, negative, unavailable |
| <b>Primary outcome: medication use</b> |                 |                                                               |                                              |
| Drug name                              | HEPMA           | Drugs of interest: Dexamethasone, remdesivir, tocilizumab [1] | Character (name, according to dm+d)          |
| Drug dose                              | HEPMA           | Prescribed and administered                                   | Numeric (mg, ml)                             |
| Prescribed date                        | HEPMA           | First prescribed date: index date                             | Date (yyyy-mm-dd)                            |
| Administered date                      | HEPMA           | Dates of drug administration                                  | Date (yyyy-mm-dd)                            |
| Duration of treatment *                | HEPMA           | (first – last administered date) [2]                          | Numeric (days)                               |
| Treatment changes *                    | HEPMA           | Changes in dosing and/or drug                                 | Categorical: yes, no                         |
| <b>Secondary outcomes</b>              |                 |                                                               |                                              |
| Hospital specialty                     | SMR01           | At admission                                                  | Character (name)                             |
| Specialty changes *                    | SMR01           | Internal transferals during stay                              | Categorical: yes, no                         |

|                                                                    |                   |                                                                     |                                                            |
|--------------------------------------------------------------------|-------------------|---------------------------------------------------------------------|------------------------------------------------------------|
| ICU/HDU                                                            | SICSAG            | Admission to intensive care                                         | Categorical: yes, no                                       |
| Discharge: alive                                                   | SMR01             | Outcome of hospital episode                                         | Categorical: home, w/family, care facility, other hospital |
| Discharge: dead                                                    | SMR01, NRS        | Outcome of hospital admission (In-hospital mortality)               | Categorical: yes, no<br>Cause: ICD-10 codes                |
| Death                                                              | NRS               | Overall mortality (after discharge)                                 | Categorical: yes, no<br>Cause: ICD-10 codes                |
| Length of stay [3]                                                 | SMR01             | Duration of in-hospital stay                                        | Numeric (days)                                             |
| <b><i>Covariates: socio-demographic</i></b>                        |                   |                                                                     |                                                            |
| Age *                                                              | GP extract        | Patient age at index date                                           | Numeric (years)                                            |
| Sex                                                                | GP extract        | Biological sex at birth                                             | Categorical: male, female                                  |
| Health Board                                                       | GP extract        | Patient place of residence at admission                             | Categorical: A&A, D&G, Forth Valley, Lanarkshire, Lothian; |
| Data zone                                                          | GP extract        | Patient place of residence                                          | Categorical                                                |
| SIMD                                                               | GP extract        | Level of deprivation, based on data zone of residence               | Categorical: 1 (most) to 5 (least deprived)                |
| <b><i>Covariates: disease (severity) related</i></b>               |                   |                                                                     |                                                            |
| COVID-19 vaccination status                                        | GP extract/ TVMT  | Status at hospital admission                                        | Categorical: unvaccinated, vaccinated once, twice          |
| Level of care                                                      | SICSAG/ SMR01     | Admission to ICU; level of care received while at ICU               | Categorical: yes, no<br>Categorical: ACP levels 0-3        |
| Supporting medication                                              | HEPMA             | Therapeutics prescribed and administered during in-hospital stay    | Character (name, according to dm+d)                        |
| <b><i>Covariates: comorbidities and concomitant medication</i></b> |                   |                                                                     |                                                            |
| Other causes of admission                                          | SMR01             | Conditions underlying or attributing to hospital admission          | ICD-10 codes                                               |
| Comorbidities                                                      | GP extract/ SMR01 | Pre-existing conditions                                             | READ codes, ICD-10 codes                                   |
| Charlson score * [38]                                              | SMR01             | Estimated based on secondary care data (historic hospital episodes) | Numeric                                                    |
| Concomitant medication                                             | PIS               | Potential proxy for comorbidities; specific drugs of interest       | Character (name, according to the BNF)                     |
| Polypharmacy *                                                     | PIS               | Based on number of different drugs prescribed simultaneously        | Categorical: yes, no                                       |

\* denotes derived variables

[1] Cut-off dates to exclude patients who have been treated as part of a clinical trial, if no trial flag participation available in the dataset: remdesivir 29.05.2020; dexamethasone 16.06.2020; tocilizumab 08.01.2021

[2] Adding discharge/outpatient prescribing if patient discharged prior to end of treatment regimen (if available)

[3] Can be derived if variable not readily available in dataset (date of discharge – first date of admission)

*ACP - Augmented Care Period; BNF - British National Formulary; dm+d - Dictionary of Medicines and Devices; ECOSS - Electronic Communication of Surveillance in Scotland; HDU - High Dependency Unit; HEPMA - Hospital Electronic Prescribing and Medicines Administration; ICD-10 - International Classification of Diseases, 10th Edition; ICU - Intensive Care Unit; NRS - National Records of Scotland; PCR - polymerase chain reaction; PIS - Prescribing Information System; RAPID - rapid preliminary in-patient data; SICSAG - Scottish Intensive Care Society Audit Group; SIMD - Scottish Index of Multiple Deprivation; SMR01 - Scottish Morbidity Records, inpatient dataset; TVMT - Tuas Vaccine Management Tool*

## Statistical analysis

All analyses relating to the primary objectives of this study will be descriptive in nature, and may include counts/frequencies for categorical variables, and mean/SD or median/IQR for continuous variables, as appropriate. In addition, patient pathways will be visualised using Sankey plots or similar techniques.

The impact of changes in treatment guidelines on the use of dexamethasone will be evaluated using interrupted time series analysis; logistic regression or time-to-event analysis (e.g. Kaplan-Meier plots) will be used to assess discharge patterns or patient mortality, if feasible.

All analyses will be conducted using R/RStudio, version 3.6.1.[39,40]

## Patient and public involvement

The EAVE II Public Advisory group are a diverse group of PPI contributors who meet monthly to incorporate the views of patients and the public into research using the EAVE II dataset. This includes shaping of research via the EAVE II Steering Group, which is attended by our two lay leads. The lay summary for this research will be co-written with our PPI contributors and shared via the outputs section of the EAVE II website,[36] hosted by the University of Edinburgh.

## ETHICS AND DISSEMINATION

Ethical and information governance approvals have been obtained by the National Research Ethics Service Committee (REC), South East Scotland 02 (REC number: 12/SS/0201), and the Public Benefit and Privacy Panel for Health and Social Care (reference number: 1920-0279) respectively. Findings from this study will be presented at academic and clinical conferences, and to the funders and other interested parties as appropriate. Study findings will also be published in peer-reviewed journals; reporting of

1  
2  
3 findings will follow the STROBE (Strengthening the Reporting of Observational Studies in  
4 Epidemiology)[41] and RECORD (Reporting of Studies conducted using Observational Routinely-collected  
5 Data) guidelines.  
6  
7

8  
9 **Acknowledgements:** We thank Dave Kelly from Albasoft Ltd for his support with making primary care  
10 data available; and Wendy Inglis-Humphrey and Vicky Hammersley for their support with project  
11 management and administration. This work is only possible because of the wealth of information  
12 collected by the NHS as part of routine clinical practice.  
13  
14

15  
16  
17 **Authors' contributions:** TM, SK, SM, AK and MB conceptualised the study. EV, AD, KF, TS and CS  
18 provided additional methodological and/or clinical advice. AS is the principal investigator of the EAVE II  
19 project and provides strategic advice. TM drafted the protocol. All authors read, critically revised, and  
20 approved the final draft.  
21  
22

23  
24  
25 **Funding:** This analysis is part of the Early Assessment of COVID-19 epidemiology and Vaccine/anti-viral  
26 Effectiveness (EAVE II) study. EAVE II is funded by the Medical Research Council [MC\_PC\_19075] with  
27 the support of BREATHE – The Health Data Research Hub for Respiratory Health [MC\_PC\_19004], which  
28 is funded through the UK Research and Innovation Industrial Strategy Challenge Fund and delivered  
29 through Health Data Research UK. Additional support has been provided through the Scottish  
30 Government DG Health and Social Care.  
31  
32

33  
34  
35 **Competing interests:** AS reports grants from NIHR, grants from MRC, grants from HDR UK, during the  
36 conduct of the study. CS reports funding from NIHR (UK), MRC (UK), CSO (UK), Health Research Council  
37 (NZ), and Ministry for Business, Innovation and Employment (NZ) during the conduct of this study. KF is  
38 Director of Triscribe Ltd, a company providing data quality services and software support. All other  
39 authors report no conflicts of interest.  
40  
41

42  
43  
44  
45 **Data availability statement:** NHS data is confidential, and is only available upon request subject to  
46 approval by a Caldicott Guardian/the Public Benefit and Privacy Panel for Health and Social Care.  
47  
48

49 **Patient consent for publication:** Not required.  
50  
51  
52  
53  
54  
55  
56  
57  
58  
59  
60



## REFERENCES

- 1 WHO. Coronavirus disease (COVID-19) – World Health Organization. 2021. <https://www.who.int/emergencies/diseases/novel-coronavirus-2019> (accessed 8 Jun 2021).
- 2 NHS 24. Coronavirus (COVID-19) in Scotland | NHS inform. 2021. <https://www.nhsinform.scot/illnesses-and-conditions/infections-and-poisoning/coronavirus-covid-19> (accessed 8 Jun 2021).
- 3 Kevadiya BD, Machhi J, Herskovitz J, *et al*. Pharmacotherapeutics of SARS-CoV-2 Infections. *J Neuroimmune Pharmacol* 2021;:1–26. doi:10.1007/s11481-020-09968-x
- 4 Iacobucci G. Long covid: Damage to multiple organs presents in young, low risk patients. *BMJ* 2020;**371**:m4470. doi:10.1136/bmj.m4470
- 5 Clift AK, Coupland CAC, Keogh RH, *et al*. Living risk prediction algorithm (QCOVID) for risk of hospital admission and mortality from coronavirus 19 in adults: national derivation and validation cohort study. *BMJ* 2020;**371**:m3731. doi:10.1136/bmj.m3731
- 6 Vasileiou E, Simpson CR, Shi T, *et al*. Interim findings from first-dose mass COVID-19 vaccination roll-out and COVID-19 hospital admissions in Scotland: a national prospective cohort study. *The Lancet* 2021;**397**:1646–57. doi:10.1016/S0140-6736(21)00677-2
- 7 Vasileiou E, Simpson CR, Robertson C, *et al*. Effectiveness of First Dose of COVID-19 Vaccines Against Hospital Admissions in Scotland: National Prospective Cohort Study of 5.4 Million People. Rochester, NY: : Social Science Research Network 2021. doi:10.2139/ssrn.3789264
- 8 Beigel JH, Tomashek KM, Dodd LE, *et al*. Remdesivir for the Treatment of Covid-19 — Final Report. *New England Journal of Medicine* Published Online First: 22 May 2020. doi:10.1056/NEJMoa2007764
- 9 Horby PW, Mafham M, Bell JL, *et al*. Lopinavir–ritonavir in patients admitted to hospital with COVID-19 (RECOVERY): a randomised, controlled, open-label, platform trial. *The Lancet* 2020;**396**:1345–52. doi:10.1016/S0140-6736(20)32013-4
- 10 RECOVERY Collaborative Group, Horby P, Lim WS, *et al*. Dexamethasone in Hospitalized Patients with Covid-19. *N Engl J Med* 2021;**384**:693–704. doi:10.1056/NEJMoa2021436
- 11 REMAP-CAP Investigators. Interleukin-6 Receptor Antagonists in Critically Ill Patients with Covid-19. *New England Journal of Medicine* 2021;**384**:1491–502. doi:10.1056/NEJMoa2100433
- 12 RECOVERY Collaborative Group, Horby PW, Pessoa-Amorim G, *et al*. Tocilizumab in patients admitted to hospital with COVID-19 (RECOVERY): preliminary results of a randomised, controlled, open-label, platform trial. *medRxiv* 2021;:2021.02.11.21249258. doi:10.1101/2021.02.11.21249258
- 13 Weinreich DM, Sivapalasingam S, Norton T, *et al*. REGN-COV2, a Neutralizing Antibody Cocktail, in Outpatients with Covid-19. *New England Journal of Medicine* 2021;**384**:238–51. doi:10.1056/NEJMoa2035002
- 14 RECOVERY Collaborative Group, Horby PW, Mafham M, *et al*. Casirivimab and imdevimab in patients admitted to hospital with COVID-19 (RECOVERY): a randomised, controlled, open-label, platform trial. *medRxiv* 2021;:2021.06.15.21258542. doi:10.1101/2021.06.15.21258542

- 1  
2  
3 15 Abaleke E, Abbas M, Abbasi S, *et al.* Azithromycin in patients admitted to hospital with COVID-19 (RECOVERY):  
4 a randomised, controlled, open-label, platform trial. *The Lancet* 2021;**397**:605–12. doi:10.1016/S0140-  
5 6736(21)00149-5  
6  
7 16 Monk PD, Marsden RJ, Tear VJ, *et al.* Safety and efficacy of inhaled nebulised interferon beta-1a (SNG001) for  
8 treatment of SARS-CoV-2 infection: a randomised, double-blind, placebo-controlled, phase 2 trial. *The Lancet*  
9 *Respiratory Medicine* 2021;**9**:196–206. doi:10.1016/S2213-2600(20)30511-7  
10  
11 17 Simonovich VA, Burgos Pratz LD, Scibona P, *et al.* A Randomized Trial of Convalescent Plasma in Covid-19  
12 Severe Pneumonia. *New England Journal of Medicine* 2021;**384**:619–29. doi:10.1056/NEJMoa2031304  
13  
14 18 National Institute for Health and Care Excellence. Recommendations | COVID-19 rapid guideline: managing  
15 COVID-19 | Guidance | NICE. <https://www.nice.org.uk/guidance/ng191/chapter/Recommendations> (accessed  
16 21 Jun 2021).  
17  
18 19 Prats-Urbe A, Sena AG, Lai LYH, *et al.* Use of repurposed and adjuvant drugs in hospital patients with covid-  
19 19: multinational network cohort study. *BMJ* 2021;**373**:n1038. doi:10.1136/bmj.n1038  
20  
21 20 Scottish Government. COVID-19 therapeutic alert: Dexamethasone in the treatment of COVID-19:  
22 implementation and management of supply for treatment in hospitals.  
23 <https://www.sehd.scot.nhs.uk/publications/DC20200616COVID-19Dexamethasone.pdf> (accessed 6 Aug  
24 2021).  
25  
26 21 NHS England. Coronavirus » Interim Clinical Commissioning Policy: Remdesivir for patients hospitalised with  
27 COVID-19 (adults and children 12 years and older).  
28 [https://www.england.nhs.uk/coronavirus/publication/interim-clinical-commissioning-policy-remdesivir-for-](https://www.england.nhs.uk/coronavirus/publication/interim-clinical-commissioning-policy-remdesivir-for-patients-hospitalised-with-covid-19-adults-and-children-12-years-and-older/)  
29 [patients-hospitalised-with-covid-19-adults-and-children-12-years-and-older/](https://www.england.nhs.uk/coronavirus/publication/interim-clinical-commissioning-policy-remdesivir-for-patients-hospitalised-with-covid-19-adults-and-children-12-years-and-older/) (accessed 23 Mar 2021).  
30  
31 22 NHS England. Coronavirus » Interim Clinical Commissioning Policy: Tocilizumab for hospitalised patients with  
32 COVID-19 pneumonia (adults). [https://www.england.nhs.uk/coronavirus/publication/interim-clinical-](https://www.england.nhs.uk/coronavirus/publication/interim-clinical-commissioning-policy-tocilizumab-for-hospitalised-patients-patients-with-covid-19-pneumonia-adults/)  
33 [commissioning-policy-tocilizumab-for-hospitalised-patients-patients-with-covid-19-pneumonia-adults/](https://www.england.nhs.uk/coronavirus/publication/interim-clinical-commissioning-policy-tocilizumab-for-hospitalised-patients-patients-with-covid-19-pneumonia-adults/)  
34 (accessed 23 Mar 2021).  
35  
36 23 Nuffield Department of Population Health. RECOVERY - Randomised Evaluation of COVID-19 Therapy.  
37 2021.<https://www.recoverytrial.net/> (accessed 8 Jun 2021).  
38  
39 24 Simpson CR, Robertson C, Vasileiou E, *et al.* Early Pandemic Evaluation and Enhanced Surveillance of COVID-19  
40 (EAVE II): protocol for an observational study using linked Scottish national data. *BMJ Open* 2020;**10**:e039097.  
41 doi:10.1136/bmjopen-2020-039097  
42  
43 25 Warren LR, Clarke J, Arora S, *et al.* Improving data sharing between acute hospitals in England: an overview of  
44 health record system distribution and retrospective observational analysis of inter-hospital transitions of care.  
45 *BMJ Open* 2019;**9**:e031637. doi:10.1136/bmjopen-2019-031637  
46  
47 26 NHS Scotland. HEPMA | eHealth. <https://www.ehealth.scot/case-studies/hepma/> (accessed 8 Jun 2021).  
48  
49 27 Scottish Government. eHealth Strategy 2014-2017. Edinburgh, UK: : Scottish Government 2015.  
50 <https://www.gov.scot/publications/ehealth-strategy-2014-2017/> (accessed 15 Oct 2020).  
51  
52 28 NHS Scotland. Organisations – Scotland’s Health on the Web. 2020.<https://www.scot.nhs.uk/organisations/>  
53 (accessed 8 Jun 2021).  
54  
55  
56  
57  
58  
59  
60

- 1  
2  
3 29 NHS Digital. Rule logic. NHS Digital. <https://digital.nhs.uk/coronavirus/shielded-patient-list/methodology/rule-logic> (accessed 7 Jun 2021).  
4  
5  
6 30 Public Health Scotland. Population Estimates - Scottish Health and Social Care Open Data.  
7 2021.<https://www.opendata.nhs.scot/dataset/population-estimates> (accessed 14 Jun 2021).  
8  
9 31 Information Services Division. Data Dictionary A-Z: CHI number. ISD Scotland Data Dictionary.  
10 <https://www.ndc.scot.nhs.uk/Dictionary-A-Z/Definitions/index.asp?ID=128&Title=CHI%20Number> (accessed  
11 15 Oct 2020).  
12  
13 32 Health Protection Scotland. Data and surveillance. <https://www.hps.scot.nhs.uk/data/> (accessed 8 Jun 2021).  
14  
15 33 NHS Education for Scotland. Turas Vaccination Management tool.  
16 2021.<https://learn.nes.nhs.scot/42708/turas-vaccination-management-tool> (accessed 8 Jun 2021).  
17  
18 34 Information Services Division. National Data Catalogue: National Datasets. ISD Scotland National Data  
19 Catalogue. <https://www.ndc.scot.nhs.uk/National-Datasets/index.asp> (accessed 15 Oct 2020).  
20  
21 35 NHS Digital. Hospital Electronic Prescribing and Medicines Administration (HEPMA) Data - Scotland. NHS  
22 Digital. [https://digital.nhs.uk/about-nhs-digital/corporate-information-and-documents/directions-and-data-  
23 provision-notice/data-provision-notice-dpns/electronic-prescribing-and-medicines-administration-data-  
24 scotland](https://digital.nhs.uk/about-nhs-digital/corporate-information-and-documents/directions-and-data-provision-notice/data-provision-notice-dpns/electronic-prescribing-and-medicines-administration-data-scotland) (accessed 8 Jun 2021).  
25  
26 36 University of Edinburgh. EAVE II. The University of Edinburgh. <https://www.ed.ac.uk/usher/eave-ii> (accessed 8  
27 Jun 2021).  
28  
29 37 Scottish Government. The Scottish Index of Multiple Deprivation. Statistics.  
30 2020.<https://www2.gov.scot/SIMD> (accessed 15 Oct 2020).  
31  
32 38 Quan H, Sundararajan V, Halfon P, *et al*. Coding algorithms for defining comorbidities in ICD-9-CM and ICD-10  
33 administrative data. *Med Care* 2005;**43**:1130–9. doi:10.1097/01.mlr.0000182534.19832.83  
34  
35 39 R Core Team. *R: A language and environment for statistical computing*. Vienna, Austria: : R Foundation for  
36 Statistical Computing 2020. <https://www.R-project.org/>  
37  
38 40 RStudio Team. *RStudio: Integrated Development for R*. Boston, MA: : RStudio, PBC 2020.  
39 <http://www.rstudio.com/>  
40  
41 41 Elm E von, Altman DG, Egger M, *et al*. Strengthening the reporting of observational studies in epidemiology  
42 (STROBE) statement: guidelines for reporting observational studies. *BMJ* 2007;**335**:806–8.  
43 doi:10.1136/bmj.39335.541782.AD  
44  
45  
46  
47  
48  
49  
50  
51  
52  
53  
54  
55  
56  
57  
58  
59  
60

# Reporting checklist for cohort study.

Based on the STROBE cohort guidelines.

## Instructions to authors

Complete this checklist by entering the page numbers from your manuscript where readers will find each of the items listed below.

Your article may not currently address all the items on the checklist. Please modify your text to include the missing information. If you are certain that an item does not apply, please write "n/a" and provide a short explanation.

Upload your completed checklist as an extra file when you submit to a journal.

In your methods section, say that you used the STROBE cohort reporting guidelines, and cite them as:

von Elm E, Altman DG, Egger M, Pocock SJ, Gøtzsche PC, Vandenbroucke JP. The Strengthening of Reporting of Observational Studies in Epidemiology (STROBE) Statement: guidelines for reporting observational studies.

|                           |                     |                                                                                    | Page   |
|---------------------------|---------------------|------------------------------------------------------------------------------------|--------|
|                           |                     | Reporting Item                                                                     | Number |
| <b>Title and abstract</b> |                     |                                                                                    |        |
| Title                     | <a href="#">#1a</a> | Indicate the study's design with a commonly used term in the title or the abstract | 0,1    |
| Abstract                  | <a href="#">#1b</a> | Provide in the abstract an informative and balanced summary                        | 1      |

of what was done and what was found

## Introduction

Background / [#2](#) Explain the scientific background and rationale for the 3,4  
 rationale investigation being reported

Objectives [#3](#) State specific objectives, including any prespecified 5  
 hypotheses

## Methods

Study design [#4](#) Present key elements of study design early in the paper 5,6

Setting [#5](#) Describe the setting, locations, and relevant dates, including 5,6  
 periods of recruitment, exposure, follow-up, and data collection

Eligibility criteria [#6a](#) Give the eligibility criteria, and the sources and methods of 7  
 selection of participants. Describe methods of follow-up.

Eligibility criteria [#6b](#) For matched studies, give matching criteria and number of n/a  
 exposed and unexposed

Variables [#7](#) Clearly define all outcomes, exposures, predictors, potential 7,8,9;  
 confounders, and effect modifiers. Give diagnostic criteria, if table 1  
 applicable

Data sources / [#8](#) For each variable of interest give sources of data and details of 6; table  
 measurement methods of assessment (measurement). Describe 1  
 comparability of assessment methods if there is more than one  
 group. Give information separately for for exposed and  
 unexposed groups if applicable.

|    |                |                      |                                                                   |     |
|----|----------------|----------------------|-------------------------------------------------------------------|-----|
| 1  | Bias           | <a href="#">#9</a>   | Describe any efforts to address potential sources of bias         | n/a |
| 2  |                |                      |                                                                   |     |
| 3  |                |                      |                                                                   |     |
| 4  | Study size     | <a href="#">#10</a>  | Explain how the study size was arrived at                         | n/a |
| 5  |                |                      |                                                                   |     |
| 6  |                |                      |                                                                   |     |
| 7  | Quantitative   | <a href="#">#11</a>  | Explain how quantitative variables were handled in the            | n/a |
| 8  | variables      |                      | analyses. If applicable, describe which groupings were chosen,    |     |
| 9  |                |                      | and why                                                           |     |
| 10 |                |                      |                                                                   |     |
| 11 |                |                      |                                                                   |     |
| 12 |                |                      |                                                                   |     |
| 13 |                |                      |                                                                   |     |
| 14 |                |                      |                                                                   |     |
| 15 | Statistical    | <a href="#">#12a</a> | Describe all statistical methods, including those used to control |     |
| 16 | methods        |                      | for confounding                                                   |     |
| 17 |                |                      |                                                                   |     |
| 18 |                |                      |                                                                   |     |
| 19 |                |                      |                                                                   |     |
| 20 | 9              |                      |                                                                   |     |
| 21 |                |                      |                                                                   |     |
| 22 |                |                      |                                                                   |     |
| 23 | Statistical    | <a href="#">#12b</a> | Describe any methods used to examine subgroups and                | n/a |
| 24 | methods        |                      | interactions                                                      |     |
| 25 |                |                      |                                                                   |     |
| 26 |                |                      |                                                                   |     |
| 27 |                |                      |                                                                   |     |
| 28 |                |                      |                                                                   |     |
| 29 | Statistical    | <a href="#">#12c</a> | Explain how missing data were addressed                           | n/a |
| 30 | methods        |                      |                                                                   |     |
| 31 |                |                      |                                                                   |     |
| 32 |                |                      |                                                                   |     |
| 33 |                |                      |                                                                   |     |
| 34 | Statistical    | <a href="#">#12d</a> | If applicable, explain how loss to follow-up was addressed        | n/a |
| 35 | methods        |                      |                                                                   |     |
| 36 |                |                      |                                                                   |     |
| 37 |                |                      |                                                                   |     |
| 38 |                |                      |                                                                   |     |
| 39 | Statistical    | <a href="#">#12e</a> | Describe any sensitivity analyses                                 |     |
| 40 | methods        |                      |                                                                   |     |
| 41 |                |                      |                                                                   |     |
| 42 |                |                      |                                                                   |     |
| 43 |                |                      |                                                                   |     |
| 44 |                |                      |                                                                   |     |
| 45 | n/a            |                      |                                                                   |     |
| 46 |                |                      |                                                                   |     |
| 47 |                |                      |                                                                   |     |
| 48 | <b>Results</b> |                      |                                                                   |     |
| 49 |                |                      |                                                                   |     |
| 50 |                |                      |                                                                   |     |
| 51 | Participants   | <a href="#">#13a</a> | Report numbers of individuals at each stage of study—eg           | n/a |
| 52 |                |                      | numbers potentially eligible, examined for eligibility, confirmed |     |
| 53 |                |                      | eligible, included in the study, completing follow-up, and        |     |
| 54 |                |                      | analysed. Give information separately for for exposed and         |     |
| 55 |                |                      |                                                                   |     |
| 56 |                |                      |                                                                   |     |
| 57 |                |                      |                                                                   |     |
| 58 |                |                      |                                                                   |     |
| 59 |                |                      |                                                                   |     |
| 60 |                |                      |                                                                   |     |

unexposed groups if applicable.

|    |                  |                      |                                                               |
|----|------------------|----------------------|---------------------------------------------------------------|
| 1  |                  |                      |                                                               |
| 2  |                  |                      |                                                               |
| 3  |                  |                      |                                                               |
| 4  | Participants     | <a href="#">#13b</a> | Give reasons for non-participation at each stage              |
| 5  |                  |                      |                                                               |
| 6  |                  |                      |                                                               |
| 7  | Participants     | <a href="#">#13c</a> | Consider use of a flow diagram                                |
| 8  |                  |                      |                                                               |
| 9  |                  |                      |                                                               |
| 10 | n/a              |                      |                                                               |
| 11 |                  |                      |                                                               |
| 12 |                  |                      |                                                               |
| 13 | Descriptive data | <a href="#">#14a</a> | Give characteristics of study participants (eg demographic,   |
| 14 |                  |                      |                                                               |
| 15 |                  |                      | clinical, social) and information on exposures and potential  |
| 16 |                  |                      | confounders. Give information separately for exposed and      |
| 17 |                  |                      | unexposed groups if applicable.                               |
| 18 |                  |                      |                                                               |
| 19 |                  |                      |                                                               |
| 20 |                  |                      |                                                               |
| 21 |                  |                      |                                                               |
| 22 |                  |                      |                                                               |
| 23 | Descriptive data | <a href="#">#14b</a> | Indicate number of participants with missing data for each    |
| 24 |                  |                      |                                                               |
| 25 |                  |                      | variable of interest                                          |
| 26 |                  |                      |                                                               |
| 27 |                  |                      |                                                               |
| 28 | n/a              |                      |                                                               |
| 29 |                  |                      |                                                               |
| 30 |                  |                      |                                                               |
| 31 | Descriptive data | <a href="#">#14c</a> | Summarise follow-up time (eg, average and total amount)       |
| 32 |                  |                      |                                                               |
| 33 |                  |                      |                                                               |
| 34 | n/a              |                      |                                                               |
| 35 |                  |                      |                                                               |
| 36 |                  |                      |                                                               |
| 37 | Outcome data     | <a href="#">#15</a>  | Report numbers of outcome events or summary measures          |
| 38 |                  |                      |                                                               |
| 39 |                  |                      | over time. Give information separately for exposed and        |
| 40 |                  |                      | unexposed groups if applicable.                               |
| 41 |                  |                      |                                                               |
| 42 |                  |                      |                                                               |
| 43 |                  |                      |                                                               |
| 44 |                  |                      |                                                               |
| 45 | n/a              |                      |                                                               |
| 46 |                  |                      |                                                               |
| 47 |                  |                      |                                                               |
| 48 | Main results     | <a href="#">#16a</a> | Give unadjusted estimates and, if applicable, confounder-     |
| 49 |                  |                      |                                                               |
| 50 |                  |                      | adjusted estimates and their precision (eg, 95% confidence    |
| 51 |                  |                      | interval). Make clear which confounders were adjusted for and |
| 52 |                  |                      | why they were included                                        |
| 53 |                  |                      |                                                               |
| 54 |                  |                      |                                                               |
| 55 |                  |                      |                                                               |
| 56 |                  |                      |                                                               |
| 57 |                  |                      |                                                               |
| 58 | Main results     | <a href="#">#16b</a> | Report category boundaries when continuous variables were     |
| 59 |                  |                      |                                                               |
| 60 |                  |                      |                                                               |

|    |                          |                                                                                        |     |
|----|--------------------------|----------------------------------------------------------------------------------------|-----|
| 1  |                          | categorized                                                                            |     |
| 2  |                          |                                                                                        |     |
| 3  |                          |                                                                                        |     |
| 4  | Main results             | <a href="#">#16c</a> If relevant, consider translating estimates of relative risk into |     |
| 5  |                          | absolute risk for a meaningful time period                                             |     |
| 6  |                          |                                                                                        |     |
| 7  |                          |                                                                                        |     |
| 8  |                          |                                                                                        |     |
| 9  | n/a                      |                                                                                        |     |
| 10 |                          |                                                                                        |     |
| 11 |                          |                                                                                        |     |
| 12 | Other analyses           | <a href="#">#17</a> Report other analyses done—eg analyses of subgroups and            | n/a |
| 13 |                          | interactions, and sensitivity analyses                                                 |     |
| 14 |                          |                                                                                        |     |
| 15 |                          |                                                                                        |     |
| 16 |                          |                                                                                        |     |
| 17 | <b>Discussion</b>        |                                                                                        |     |
| 18 |                          |                                                                                        |     |
| 19 |                          |                                                                                        |     |
| 20 | Key results              | <a href="#">#18</a> Summarise key results with reference to study objectives           | n/a |
| 21 |                          |                                                                                        |     |
| 22 |                          |                                                                                        |     |
| 23 | Limitations              | <a href="#">#19</a> Discuss limitations of the study, taking into account sources of   | n/a |
| 24 |                          | potential bias or imprecision. Discuss both direction and                              |     |
| 25 |                          | magnitude of any potential bias.                                                       |     |
| 26 |                          |                                                                                        |     |
| 27 |                          |                                                                                        |     |
| 28 |                          |                                                                                        |     |
| 29 |                          |                                                                                        |     |
| 30 |                          |                                                                                        |     |
| 31 | Interpretation           | <a href="#">#20</a> Give a cautious overall interpretation considering objectives,     | n/a |
| 32 |                          | limitations, multiplicity of analyses, results from similar studies,                   |     |
| 33 |                          | and other relevant evidence.                                                           |     |
| 34 |                          |                                                                                        |     |
| 35 |                          |                                                                                        |     |
| 36 |                          |                                                                                        |     |
| 37 |                          |                                                                                        |     |
| 38 |                          |                                                                                        |     |
| 39 | Generalisability         | <a href="#">#21</a> Discuss the generalisability (external validity) of the study      | n/a |
| 40 |                          | results                                                                                |     |
| 41 |                          |                                                                                        |     |
| 42 |                          |                                                                                        |     |
| 43 |                          |                                                                                        |     |
| 44 | <b>Other Information</b> |                                                                                        |     |
| 45 |                          |                                                                                        |     |
| 46 |                          |                                                                                        |     |
| 47 | Funding                  | <a href="#">#22</a> Give the source of funding and the role of the funders for the     | 12  |
| 48 |                          | present study and, if applicable, for the original study on which                      |     |
| 49 |                          | the present article is based                                                           |     |
| 50 |                          |                                                                                        |     |
| 51 |                          |                                                                                        |     |
| 52 |                          |                                                                                        |     |
| 53 |                          |                                                                                        |     |
| 54 |                          |                                                                                        |     |
| 55 | Notes:                   |                                                                                        |     |
| 56 |                          |                                                                                        |     |
| 57 |                          |                                                                                        |     |
| 58 | • 7: 7,8,9; table 1      |                                                                                        |     |
| 59 |                          |                                                                                        |     |
| 60 |                          |                                                                                        |     |



- 1 • 8: 6; table 1 The STROBE checklist is distributed under the terms of the Creative Commons  
2  
3 Attribution License CC-BY. This checklist was completed on 18. June 2021 using  
4  
5 <https://www.goodreports.org/>, a tool made by the [EQUATOR Network](#) in collaboration with  
6  
7 [Penelope.ai](#)  
8  
9  
10  
11  
12  
13  
14  
15  
16  
17  
18  
19  
20  
21  
22  
23  
24  
25  
26  
27  
28  
29  
30  
31  
32  
33  
34  
35  
36  
37  
38  
39  
40  
41  
42  
43  
44  
45  
46  
47  
48  
49  
50  
51  
52  
53  
54  
55  
56  
57  
58  
59  
60

# BMJ Open

## Retrospective cohort study to evaluate medication use in patients hospitalised with COVID-19 in Scotland: protocol for a national observational study

|                                 |                                                                                                                                                                                                                                                                                                                                                                                                                                                                                                                                                                                                                                                                                                                                                                                                                                                                                                                                                                                                          |
|---------------------------------|----------------------------------------------------------------------------------------------------------------------------------------------------------------------------------------------------------------------------------------------------------------------------------------------------------------------------------------------------------------------------------------------------------------------------------------------------------------------------------------------------------------------------------------------------------------------------------------------------------------------------------------------------------------------------------------------------------------------------------------------------------------------------------------------------------------------------------------------------------------------------------------------------------------------------------------------------------------------------------------------------------|
| Journal:                        | <i>BMJ Open</i>                                                                                                                                                                                                                                                                                                                                                                                                                                                                                                                                                                                                                                                                                                                                                                                                                                                                                                                                                                                          |
| Manuscript ID                   | bmjopen-2021-054861.R1                                                                                                                                                                                                                                                                                                                                                                                                                                                                                                                                                                                                                                                                                                                                                                                                                                                                                                                                                                                   |
| Article Type:                   | Protocol                                                                                                                                                                                                                                                                                                                                                                                                                                                                                                                                                                                                                                                                                                                                                                                                                                                                                                                                                                                                 |
| Date Submitted by the Author:   | 12-Oct-2021                                                                                                                                                                                                                                                                                                                                                                                                                                                                                                                                                                                                                                                                                                                                                                                                                                                                                                                                                                                              |
| Complete List of Authors:       | Mueller, Tanja; University of Strathclyde, Strathclyde Institute of Pharmacy and Biomedical Sciences; Public Health Scotland Glasgow Office<br>Kerr, Steven; The University of Edinburgh, Usher Institute<br>McTaggart, Stuart; Public Health Scotland<br>Kurdi, Amanj; University of Strathclyde, Strathclyde Institute of Pharmacy and Biomedical Sciences; Public Health Scotland Glasgow Office<br>Vasileiou, Eleftheria; The University of Edinburgh, Usher Institute<br>Docherty, Annemarie; The University of Edinburgh, Usher Institute<br>Fraser, Kenny; Triscribe Limited<br>Shi, Ting; The University of Edinburgh, Usher Institute<br>Simpson, Colin; Victoria University of Wellington, School of Health, Wellington Faculty of Health; The University of Edinburgh, Usher Institute<br>Bennie, Marion; University of Strathclyde, Institute of Pharmacy and Biomedical Sciences; Public Health Scotland<br>Sheikh, Aziz; The University of Edinburgh, Usher Institute; HDR UK, BREATHE Hub |
| <b>Primary Subject Heading</b>: | Pharmacology and therapeutics                                                                                                                                                                                                                                                                                                                                                                                                                                                                                                                                                                                                                                                                                                                                                                                                                                                                                                                                                                            |
| Secondary Subject Heading:      | Health informatics                                                                                                                                                                                                                                                                                                                                                                                                                                                                                                                                                                                                                                                                                                                                                                                                                                                                                                                                                                                       |
| Keywords:                       | COVID-19, THERAPEUTICS, CLINICAL PHARMACOLOGY                                                                                                                                                                                                                                                                                                                                                                                                                                                                                                                                                                                                                                                                                                                                                                                                                                                                                                                                                            |
|                                 |                                                                                                                                                                                                                                                                                                                                                                                                                                                                                                                                                                                                                                                                                                                                                                                                                                                                                                                                                                                                          |

SCHOLARONE™  
Manuscripts



I, the Submitting Author has the right to grant and does grant on behalf of all authors of the Work (as defined in the below author licence), an exclusive licence and/or a non-exclusive licence for contributions from authors who are: i) UK Crown employees; ii) where BMJ has agreed a CC-BY licence shall apply, and/or iii) in accordance with the terms applicable for US Federal Government officers or employees acting as part of their official duties; on a worldwide, perpetual, irrevocable, royalty-free basis to BMJ Publishing Group Ltd ("BMJ") its licensees and where the relevant Journal is co-owned by BMJ to the co-owners of the Journal, to publish the Work in this journal and any other BMJ products and to exploit all rights, as set out in our [licence](#).

The Submitting Author accepts and understands that any supply made under these terms is made by BMJ to the Submitting Author unless you are acting as an employee on behalf of your employer or a postgraduate student of an affiliated institution which is paying any applicable article publishing charge ("APC") for Open Access articles. Where the Submitting Author wishes to make the Work available on an Open Access basis (and intends to pay the relevant APC), the terms of reuse of such Open Access shall be governed by a Creative Commons licence – details of these licences and which [Creative Commons](#) licence will apply to this Work are set out in our licence referred to above.

Other than as permitted in any relevant BMJ Author's Self Archiving Policies, I confirm this Work has not been accepted for publication elsewhere, is not being considered for publication elsewhere and does not duplicate material already published. I confirm all authors consent to publication of this Work and authorise the granting of this licence.

# Retrospective cohort study to evaluate medication use in patients hospitalised with COVID-19 in Scotland: protocol for a national observational study

## Authors

Tanja Mueller<sup>1,2</sup>, Steven Kerr<sup>3</sup>, Stuart McTaggart<sup>4</sup>, Amanj Kurdi<sup>1,2</sup>, Eleftheria Vasileiou<sup>3</sup>, Annemarie Docherty<sup>3</sup>, Kenny Fraser<sup>5</sup>, Ting Shi<sup>3</sup>, Colin R Simpson<sup>3,6</sup>, Marion Bennie<sup>1,4</sup>, Aziz Sheikh<sup>3,7</sup>

## Affiliations

<sup>1</sup>Strathclyde Institute of Pharmacy and Biomedical Sciences, University of Strathclyde, Glasgow, UK

<sup>2</sup>Public Health Scotland, Glasgow, UK

<sup>3</sup>Usher Institute, University of Edinburgh, Edinburgh, UK

<sup>4</sup>Public Health Scotland, Edinburgh, UK

<sup>5</sup>Triscribe Ltd, Glasgow, UK

<sup>6</sup>School of Health, Wellington Faculty of Health, Victoria University of Wellington, Wellington, NZ

<sup>7</sup>HDR UK BREATHE Hub, Edinburgh, UK

## Corresponding author

Tanja Mueller, Strathclyde Institute of Pharmacy and Biomedical Sciences, University of Strathclyde, 161 Cathedral Street, Glasgow G4 0RE, UK; email [tanja.muller@strath.ac.uk](mailto:tanja.muller@strath.ac.uk)

## ORCID

Tanja Mueller: 0000-0002-0418-4789

Amanj Kurdi: 0000-0001-5036-1988

Eleftheria Vasileiou: 0000-0001-6850-7578

Annemarie Docherty: 0000-0001-8277-420X

Ting Shi: 0000-0002-4101-4535

Colin Simpson: 0000-0002-5194-8083

Marion Bennie: 0000-0002-4046-629x

Aziz Sheikh: 0000-0001-7022-3056

**Key words:** COVID-19, hospital treatment, drug utilisation, dexamethasone, remdesivir, tocilizumab

**Word count:** abstract 319; main text 2376 (excluding abstract, tables and references)

## Abstract

**Introduction:** Coronavirus disease 2019 (COVID-19) has caused millions of hospitalisations and deaths globally. A range of vaccines have been developed and are being deployed at scale in the UK to prevent SARS-CoV-2 infection, which have reduced risk of infection and severe COVID-19 outcomes. Those with COVID-19 are now being treated with several repurposed drugs based on evidence emerging from recent clinical trials. However, there is currently limited real-world data available related to the use of these drugs in routine clinical practice. The purpose of this study is to address the prevailing knowledge gaps regarding the use of dexamethasone, remdesivir, and tocilizumab by conducting an exploratory drug utilisation study, aimed at providing in-depth descriptions of patients receiving these drugs as well as the treatment patterns observed in Scotland.

**Methods and analysis:** Retrospective cohort study, comprising adult patients admitted to hospital with confirmed or suspected COVID-19 across five Scottish Health Boards using data from in-hospital ePrescribing linked to the Early Estimation of Vaccine and Anti-Viral Effectiveness (EAVE II) COVID-19 surveillance platform. The primary outcome will be exposure to the medicines of interest (dexamethasone, remdesivir, tocilizumab), either alone or in combination; exposure will be described in terms of drug(s) of choice; prescribed and administered dose; treatment duration; and any changes in treatment, e.g. dose escalation and/or switching to an alternative drug. Analyses will primarily be descriptive in nature.

**Ethics and dissemination:** Ethical and information governance approvals have been obtained by the National Research Ethics Service Committee, South East Scotland 02, and the Public Benefit and Privacy Panel for Health and Social Care, respectively. Findings from this study will be presented at academic and clinical conferences, and to the funders and other interested parties as appropriate; study findings will also be published in peer-reviewed journals. Publications will be available on the EAVE II website (<https://www.ed.ac.uk/usher/eave-ii/key-outputs/our-publications>), alongside lay summaries and infographics aimed at the general public. Press releases will also be considered, if appropriate.

### Strengths and limitations of this study

- This study will use data collected as part of routine care to address prevailing knowledge gaps with regards to the treatment of hospitalised COVID-19 patients.
- In-patient electronic prescribing data will be linked with a wide range of other datasets, enabling an in-depth description of current clinical practice in Scotland.
- Analyses will mainly be descriptive in nature; although comprising basic testing for associations between variables, causal analyses will be outwith the scope of this study due to its observational nature.

## INTRODUCTION

Since first appearing in Wuhan, China, in late 2019, the new “severe acute respiratory syndrome coronavirus 2” (SARS-CoV-2) has spread globally, resulting in the World Health Organization (WHO) first declaring a Public Health Emergency of International Concern and then, in March 2020, a pandemic.[1] The disease caused by SARS-CoV-2 is now widely known as “coronavirus disease 2019”, or COVID-19.

Early symptoms of COVID-19 tend to occur between 5 – 10 days after infection, and commonly include fever, loss of smell and/or taste, and a persistent cough.[2] Symptoms may become increasingly severe over a period of approximately two weeks, and can lead to hospitalisation mainly due to breathing problems; patients with severe disease frequently require mechanical ventilation.[3] COVID-19 potentially leads to organ damage, and can result in long-term health problems (“long COVID”).[4] Disease outcomes generally appear to be linked to age and pre-existing conditions, including cardiovascular diseases and diabetes.[5]

A number of COVID-19 vaccines have been developed and are now being successfully deployed at scale in the UK.[6,7] Furthermore, while the condition itself is self-limiting in the majority of cases, a range of repurposed drugs are currently being used to alleviate symptoms and/or decrease mortality in hospitalised COVID-19 patients, mostly based on evidence emerging from clinical trials – including, e.g., antiviral drugs that have previously been tested in conditions caused by similar viruses such as SARS or MERS (Middle East respiratory syndrome) or other viral infections such as HIV or Ebola;[8,9] anti-inflammatory drugs including corticosteroids[10] and monoclonal antibodies;[11–14] and a raft of other drugs, from antibiotics[15] to interferons.[16] In addition, convalescent plasma therapy has been proposed.[17]

With interest in this area remaining high, new study results being reported on a frequent basis, and several clinical trials still ongoing, treatment recommendations are rapidly updated;[18] therefore, treatment guidelines – and, consequently, clinical practice – are likely to differ substantially, both across countries and over time. For instance, a recent multi-national cohort study has investigated the use of repurposed and adjuvant drugs in hospitalised COVID-19 patients in China, South Korea, Spain, and the United States, and found that azithromycin, the antivirals lopinavir and ritonavir, and the anti-malaria drug hydroxychloroquine were frequently used at the beginning of the pandemic; however, following reports of the non-effectiveness of these drugs in combination with safety issues related to

1  
2  
3 hydroxychloroquine, their use has declined, and dexamethasone and remdesivir use have instead been  
4 increasing. In addition, use patterns differed considerably between these countries.[19]

5  
6  
7 Dexamethasone,[20] remdesivir,[21] and tocilizumab[22] have been recommended for use in  
8 hospitalised patients with severe COVID-19 within the UK based on randomised controlled trial  
9 evidence, most prominently the RECOVERY trial.[23] There is, however, currently limited real-world  
10 evidence available related to the use of these drugs in routine clinical practice. For instance, it is thus far  
11 unclear which patients are being prescribed dexamethasone, remdesivir, and/or tocilizumab as part of  
12 their in-hospital treatment, and at what point; what the most common treatment patterns are; how the  
13 use of these drugs has changed since the start of the pandemic; and whether there are any geographical  
14 differences observable. Further evidence on the real-world clinical effectiveness and safety of these  
15 drugs is also required.[24]

16  
17  
18 There have been few published studies of in-hospital drug utilisation. This has been due, in part, to  
19 patient-level data being unavailable as drug prescribing and administration records are paper-based in  
20 many secondary care settings.[25] The implementation of electronic prescribing in hospitals in Scotland  
21 has simplified data sharing across health care settings. The wider roll-out of the “Hospital Electronic  
22 Prescribing and Medicines Administration” (HEPMA) system was initiated in 2014[26] in line with the  
23 Scottish eHealth strategy,[27] and HEPMA is now available to hospitals across five out of the 14 Health  
24 Boards in Scotland (regional organisations responsible for delivering health care to their respective  
25 populations).[28]

26  
27  
28 Our aim is to contribute to addressing the prevailing knowledge gaps by conducting an exploratory drug  
29 utilisation study using data from in-hospital ePrescribing linked to the Early Estimation of Vaccine and  
30 Anti-Viral Effectiveness (EAVE II) COVID-19 surveillance platform.[24] This linked data will be analysed to  
31 provide an in-depth description of the treatments hospitalised COVID-19 patients receive (whether  
32 alone or in combination), and to describe the outcomes in these patients. The drugs of interest include  
33 dexamethasone, remdesivir, and tocilizumab, based on information requests by clinicians working in this  
34 setting; these drugs are currently routinely used in patients hospitalised with COVID-19 in Scotland due  
35 to recent treatment recommendations.



### Primary objectives

- Identify patients being treated with dexamethasone, remdesivir, and/or tocilizumab (either as monotherapy or in combination) for COVID-19 after being admitted to hospital as part of standard care;
- Describe and summarise baseline characteristics of these patients, including COVID-19 status (suspected at hospital admission based on symptoms, vs confirmed via polymerase chain reaction (PCR) test); socio-demographics (age; sex; Health Board; deprivation; hospital type; admission from care home; hospital readmission); and clinical variables potentially related to treatment choice and/or possible outcomes (including, but not restricted to, comorbidities,[29] concomitant medication, and Intensive Care Unit (ICU) admission);
- Describe treatment patterns, including drug chosen and dose administered; treatment duration; dose escalations; and changes in the drug given (e.g. switching from dexamethasone to hydrocortisone or methylprednisolone);
- Describe patterns of medicines use over time and across geographical areas, and potentially by patient characteristic as and when appropriate;
- Map out patient pathways and describe admission episodes and their outcomes (hospital admission details and duration of in-hospital stay, ICU transferal, administration of dexamethasone or any other drug of interest, discharge or death); potentially stratified by patient characteristics as and when appropriate.

### Secondary objective

- Evaluate the impact of guideline changes on the patterns of use of dexamethasone, remdesivir, and tocilizumab over time.

## METHODS AND ANALYSIS

### Study design

Retrospective cohort study, comprising adult patients (18 years of age or older) admitted to hospital with confirmed or suspected COVID-19 across five Scottish Health Boards: NHS Ayrshire & Arran, NHS

1  
2  
3 Dumfries & Galloway, NHS Forth Valley, NHS Lanarkshire, and NHS Lothian. The total population size of  
4 these Health Boards was approximately 2.4m people (~45% of the Scottish population) in mid-2019.[30]  
5  
6 However, since implementation of HEPMA in NHS Lothian happened later than in the other Health  
7  
8 Boards, data might not be as complete, particularly for the early months of the study period.  
9

## 10 **Data sources**

11  
12  
13 The data to be used for this study is part of the EAVE II platform, which has been implemented to  
14 determine COVID-19 related risk factors and the COVID-19 health care burden; and to evaluate the  
15 uptake, safety, and effectiveness of therapeutic interventions.[24] All data have been collected as part  
16 of routine care.  
17  
18

19  
20  
21 The EAVE II data source contains primary health care records, linked with patient-level secondary care  
22 data using the Community Health Index (CHI) number[31] – a unique patient identifier used throughout  
23 the Scottish health system – and comprises the following datasets:  
24

- 25  
26 ● COVID-19 test results: Electronic Communication of Surveillance Scotland (ECOSS)[32]
- 27  
28 ● Vaccination status: Turas Vaccine Management Tool (TVMT),[33] GP extract
- 29  
30 ● Hospital admissions and in-patient episodes: Scottish Morbidity Record (SMR01), Rapid  
31 Preliminary Inpatient Data (RAPID), and Scottish Intensive Care Society Audit Group database  
32 (SICSAG)[34]
- 33  
34 ● In-hospital medicines use and community prescriptions: HEPMA[35] and Prescribing Information  
35 System (PIS)[34], respectively
- 36  
37 ● Mortality: National Records of Scotland (NRS)[34]
- 38  
39  
40  
41  
42  
43

44 HEPMA will be used for identification of the main study outcomes, including medication use patterns; all  
45 available datasets may be used to identify other study outcomes as appropriate and feasible.  
46  
47

48 EAVE II data are held by Public Health Scotland; pseudonymised data will be accessed using the National  
49 Safe Haven, a secure, closed environment.[36]  
50  
51  
52  
53  
54  
55  
56  
57  
58  
59  
60

### Study population

The study population will comprise all adult patients admitted to hospital in the five aforementioned Health Boards since 01.03.2020 with a primary diagnosis of COVID-19, up to the latest date available. COVID-19 hospitalisations will be defined as hospitalisations within 28 days of a positive PCR test, or based on an admission with an ICD-10 code for COVID-19 (U07.1 and U07.2) as recorded in hospital episode records (SMR01 and/or RAPID); ICD-10 diagnoses will be confirmed using available PCR test results (ECOSS) where possible. Hence, the population will include both laboratory confirmed and clinical based diagnosis, respectively.

Patients will be followed up from the index date, defined as the first prescribing date for any of the medications of interest (the exposure), until discharge from hospital, death, or the end of the study period subject to data availability, whichever occurs first.

Patients receiving any of the drugs as part of a clinical trial will be excluded for analyses based on trial participation information if available (e.g. trial flag in HEPMA); or based on the dates where drugs became recommended for use in daily practice as communicated by the Scottish Government/NHS Scotland (see also Table 1 below for details).

### Primary outcome

The primary outcome will be treatment with the medicines of interest, either alone or in combination, with a particular emphasis on dexamethasone as dexamethasone is the most widely used of these drugs, and the availability of both prescribing and administration data is expected to be high. All patients receiving dexamethasone will be included in the first instance; however, analyses will mainly focus on those receiving the recommended dosing regimen for patients with COVID-10 (6mg po or 1.8ml iv, once daily for 10 days)[20] since other dosing regimens are more likely being prescribed for indications other than COVID-19. Alternative recommended corticosteroids such as prednisolone and hydrocortisone will also be considered (recommended doses: 40mg po once daily for 10 days; 50mg iv every eight hours for 10 days, respectively). Remdesivir and tocilizumab will be included for analyses where sufficient data are available; since these two drugs are given intravenously, the data available might be limited (i.e. exclude the exact dose administered).

Exposure will be described in terms of drug(s) of choice; prescribed and administered dose; treatment duration; and any changes in treatment, e.g. dose escalation and/or switching to an alternative drug

1  
2  
3 (including time to dose escalation/switching and reasons for these, if available). The first drug prescribed  
4 on HEPMA following admission to hospital on or after the date of (possible) COVID-19 diagnosis will be  
5 defined as the index drug (i.e. dexamethasone, remdesivir, or tocilizumab); the date of the first recorded  
6 prescription will be used as the index date (for the purpose of setting the baseline). Duration of  
7 treatment will be calculated using the dates of first/last recorded administration of the drug in question.  
8  
9

### 12 **Other outcomes**

14 Additional outcomes relating to the primary study objective include hospital specialty at admission, in-  
15 hospital transfer (e.g. admission to ICU), length of stay, and outcome of hospital episode (discharge or  
16 death).  
17  
18

19  
20  
21 Secondary outcomes include in-hospital mortality, i.e. death on the same day as discharge; and out-of-  
22 hospital mortality following discharge, if feasible.  
23  
24

### 25 **Covariates**

26  
27 Patient characteristics of interest that might potentially influence choice of drug, duration of treatment,  
28 and (possibly) treatment outcomes will be identified and summarised at baseline, and comprise socio-  
29 demographic factors (age, sex, Health Board of residence, level of deprivation); disease-related aspects;  
30 comorbidities; and concomitant medication.  
31  
32  
33  
34

35 The level of deprivation will be characterised using the Scottish Index of Multiple Deprivation (SIMD), an  
36 area index combining information with regards to health, access to services, education, employment,  
37 income, housing, and crime.[37] Disease-related aspects refer to information potentially linked to  
38 disease severity, e.g. level of hospital care/additional treatments received (ICU admission, mechanical  
39 ventilation) if and where available; while O<sub>2</sub> saturation levels would be highly relevant, particularly with  
40 regards to treatment outcomes, this information is not present in the available dataset. Comorbidities of  
41 interest will comprise mainly those conditions used to identify patients at high risk of adverse outcomes  
42 (i.e. shielding list),[29] e.g. respiratory disease (asthma, chronic obstructive pulmonary disease (COPD)),  
43 cardiovascular diseases, diabetes (type 1 and type 2), chronic kidney disease, and cancer; other  
44 comorbidities might also be included. Concomitant medication at baseline will focus on drugs potentially  
45 impacting the immune system and/or affecting the risk of infections (immuno-suppressants, steroids,  
46 antimicrobial drugs), and those with an (hypothesised) effect on disease severity or outcome – either  
47 directly or as a proxy for underlying conditions potentially not captured otherwise within the dataset  
48  
49  
50  
51  
52  
53  
54  
55  
56  
57  
58  
59  
60

(e.g. long-acting muscarinic antagonists (LAMA)/long acting beta-agonists (LABA), insulin and anti-diabetic drugs, anticoagulants, antiplatelet drugs, angiotensin-converting enzyme (ACE) inhibitors, angiotensin receptor blockers (ARBs)). If possible, COVID-19 vaccination status of patients will also be assessed. Furthermore, the presence of polypharmacy – defined as the simultaneous use of five or more different medications prior to being admitted to hospital – will be identified.

Baseline characteristics will be defined using all available data, with restrictions on included time periods (mainly with regards to concomitant medication) based on the specifications used in previous studies.[5,6,24]

Exposure, outcome, and relevant covariates – alongside the data source, their coding, and a brief description – are presented in table 1.

**Table 1: Description of variables (cohort identification, outcomes, covariates)**

| Variable                               | Data source     | Description                                                   | Value                                        |
|----------------------------------------|-----------------|---------------------------------------------------------------|----------------------------------------------|
| <b>Cohort: COVID-19 status</b>         |                 |                                                               |                                              |
| Cause of admission                     | SMR01/<br>RAPID | Suspected or confirmed                                        | ICD10 codes: U07.1, U07.2                    |
| PCR test result                        | ECOSS           | COVID-19 test result (within 28 days prior to admission)      | Categorical: Positive, negative, unavailable |
| <b>Primary outcome: medication use</b> |                 |                                                               |                                              |
| Drug name                              | HEPMA           | Drugs of interest: Dexamethasone, remdesivir, tocilizumab [1] | Character (name, according to dm+d)          |
| Drug dose                              | HEPMA           | Prescribed and administered                                   | Numeric (mg, ml)                             |
| Prescribed date                        | HEPMA           | First prescribed date: index date                             | Date (yyyy-mm-dd)                            |
| Administered date                      | HEPMA           | Dates of drug administration                                  | Date (yyyy-mm-dd)                            |
| Duration of treatment *                | HEPMA           | (first – last administered date) [2]                          | Numeric (days)                               |
| Treatment changes *                    | HEPMA           | Changes in dosing and/or drug                                 | Categorical: yes, no                         |
| <b>Secondary outcomes</b>              |                 |                                                               |                                              |
| Hospital specialty                     | SMR01           | At admission                                                  | Character (name)                             |
| Specialty changes *                    | SMR01           | Internal transferals during stay                              | Categorical: yes, no                         |

|                                                                    |                   |                                                                     |                                                            |
|--------------------------------------------------------------------|-------------------|---------------------------------------------------------------------|------------------------------------------------------------|
| ICU/HDU                                                            | SICSAG            | Admission to intensive care                                         | Categorical: yes, no                                       |
| Discharge: alive                                                   | SMR01             | Outcome of hospital episode                                         | Categorical: home, w/family, care facility, other hospital |
| Discharge: dead                                                    | SMR01, NRS        | Outcome of hospital admission (In-hospital mortality)               | Categorical: yes, no<br>Cause: ICD-10 codes                |
| Death                                                              | NRS               | Overall mortality (after discharge)                                 | Categorical: yes, no<br>Cause: ICD-10 codes                |
| Length of stay [3]                                                 | SMR01             | Duration of in-hospital stay                                        | Numeric (days)                                             |
| <b><i>Covariates: socio-demographic</i></b>                        |                   |                                                                     |                                                            |
| Age *                                                              | GP extract        | Patient age at index date                                           | Numeric (years)                                            |
| Sex                                                                | GP extract        | Biological sex at birth                                             | Categorical: male, female                                  |
| Health Board                                                       | GP extract        | Patient place of residence at admission                             | Categorical: A&A, D&G, Forth Valley, Lanarkshire, Lothian; |
| Data zone                                                          | GP extract        | Patient place of residence                                          | Categorical                                                |
| SIMD                                                               | GP extract        | Level of deprivation, based on data zone of residence               | Categorical: 1 (most) to 5 (least deprived)                |
| <b><i>Covariates: disease (severity) related</i></b>               |                   |                                                                     |                                                            |
| COVID-19 vaccination status                                        | GP extract/ TVMT  | Status at hospital admission                                        | Categorical: unvaccinated, vaccinated once, twice          |
| Level of care                                                      | SICSAG/ SMR01     | Admission to ICU; level of care received while at ICU               | Categorical: yes, no<br>Categorical: ACP levels 0-3        |
| Supporting medication                                              | HEPMA             | Therapeutics prescribed and administered during in-hospital stay    | Character (name, according to dm+d)                        |
| <b><i>Covariates: comorbidities and concomitant medication</i></b> |                   |                                                                     |                                                            |
| Other causes of admission                                          | SMR01             | Conditions underlying or attributing to hospital admission          | ICD-10 codes                                               |
| Comorbidities                                                      | GP extract/ SMR01 | Pre-existing conditions                                             | READ codes, ICD-10 codes                                   |
| Charlson score * [38]                                              | SMR01             | Estimated based on secondary care data (historic hospital episodes) | Numeric                                                    |
| Concomitant medication                                             | PIS               | Potential proxy for comorbidities; specific drugs of interest       | Character (name, according to the BNF)                     |
| Polypharmacy *                                                     | PIS               | Based on number of different drugs prescribed simultaneously        | Categorical: yes, no                                       |

\* denotes derived variables

[1] Cut-off dates to exclude patients who have been treated as part of a clinical trial, if no trial flag participation available in the dataset: remdesivir 29.05.2020; dexamethasone 16.06.2020; tocilizumab 08.01.2021

[2] Adding discharge/outpatient prescribing if patient discharged prior to end of treatment regimen (if available)

[3] Can be derived if variable not readily available in dataset (date of discharge – first date of admission)

*ACP - Augmented Care Period; BNF - British National Formulary; dm+d - Dictionary of Medicines and Devices; ECOSS - Electronic Communication of Surveillance in Scotland; HDU - High Dependency Unit; HEPMA - Hospital Electronic Prescribing and Medicines Administration; ICD-10 - International Classification of Diseases, 10th Edition; ICU - Intensive Care Unit; NRS - National Records of Scotland; PCR - polymerase chain reaction; PIS - Prescribing Information System; RAPID - rapid preliminary in-patient data; SICSAG - Scottish Intensive Care Society Audit Group; SIMD - Scottish Index of Multiple Deprivation; SMR01 - Scottish Morbidity Records, inpatient dataset; TVMT - Tuas Vaccine Management Tool*

## Statistical analysis

All analyses relating to the primary objectives of this study will be descriptive in nature, and may include counts/frequencies for categorical variables, and mean/SD or median/IQR for continuous variables, as appropriate. In addition, patient pathways will be visualised using Sankey plots or similar techniques.

The impact of changes in treatment guidelines on the use of dexamethasone will be evaluated using interrupted time series analysis; logistic regression or time-to-event analysis (e.g. Kaplan-Meier plots) will be used to assess discharge patterns or patient mortality, if feasible.

All analyses will be conducted using R/RStudio, version 3.6.1.[39,40]

## Patient and public involvement

The EAVE II Public Advisory group are a diverse group of PPI contributors who meet monthly to incorporate the views of patients and the public into research using the EAVE II dataset. This includes shaping of research via the EAVE II Steering Group, which is attended by our two lay leads. The lay summary for this research will be co-written with our PPI contributors and shared via the outputs section of the EAVE II website,[36] hosted by the University of Edinburgh.

## ETHICS AND DISSEMINATION

Ethical and information governance approvals have been obtained by the National Research Ethics Service Committee (REC), South East Scotland 02 (REC number: 12/SS/0201), and the Public Benefit and Privacy Panel for Health and Social Care (reference number: 1920-0279) respectively. Findings from this study will be presented at academic and clinical conferences, and to the funders and other interested parties as appropriate. Study findings will also be published in peer-reviewed journals; reporting of

1  
2  
3 findings will follow the STROBE (Strengthening the Reporting of Observational Studies in  
4 Epidemiology)[41] and RECORD (Reporting of Studies conducted using Observational Routinely-collected  
5 Data) guidelines.  
6  
7

8  
9 **Acknowledgements:** We thank Dave Kelly from Albasoft Ltd for his support with making primary care  
10 data available; and Wendy Inglis-Humphrey and Vicky Hammersley for their support with project  
11 management and administration. This work is only possible because of the wealth of information  
12 collected by the NHS as part of routine clinical practice.  
13  
14

15  
16  
17 **Authors' contributions:** TM, SK, SM, AK and MB conceptualised the study. EV, AD, KF, TS and CS  
18 provided additional methodological and/or clinical advice. AS is the principal investigator of the EAVE II  
19 project and provides strategic advice. TM drafted the protocol. All authors read, critically revised, and  
20 approved the final draft.  
21  
22

23  
24  
25 **Funding:** This analysis is part of the Early Assessment of COVID-19 epidemiology and Vaccine/anti-viral  
26 Effectiveness (EAVE II) study. EAVE II is funded by the Medical Research Council [MC\_PC\_19075] with  
27 the support of BREATHE – The Health Data Research Hub for Respiratory Health [MC\_PC\_19004], which  
28 is funded through the UK Research and Innovation Industrial Strategy Challenge Fund and delivered  
29 through Health Data Research UK. Additional support has been provided through the Scottish  
30 Government DG Health and Social Care.  
31  
32

33  
34  
35  
36 **Competing interests:** AS reports grants from NIHR, grants from MRC, grants from HDR UK, during the  
37 conduct of the study. CS reports funding from NIHR (UK), MRC (UK), CSO (UK), Health Research Council  
38 (NZ), and Ministry for Business, Innovation and Employment (NZ) during the conduct of this study. KF is  
39 Director of Triscribe Ltd, a company providing data quality services and software support. All other  
40 authors report no conflicts of interest.  
41  
42  
43

44  
45 **Data availability statement:** NHS data is confidential, and is only available upon request subject to  
46 approval by a Caldicott Guardian/the Public Benefit and Privacy Panel for Health and Social Care.  
47  
48

49 **Patient consent for publication:** Not required.  
50  
51  
52  
53  
54  
55  
56  
57  
58  
59  
60



## REFERENCES

- 1 WHO. Coronavirus disease (COVID-19) – World Health Organization. 2021. <https://www.who.int/emergencies/diseases/novel-coronavirus-2019> (accessed 8 Jun 2021).
- 2 NHS 24. Coronavirus (COVID-19) in Scotland | NHS inform. 2021. <https://www.nhsinform.scot/illnesses-and-conditions/infections-and-poisoning/coronavirus-covid-19> (accessed 8 Jun 2021).
- 3 Kevadiya BD, Machhi J, Herskovitz J, *et al*. Pharmacotherapeutics of SARS-CoV-2 Infections. *J Neuroimmune Pharmacol* 2021;:1–26. doi:10.1007/s11481-020-09968-x
- 4 Iacobucci G. Long covid: Damage to multiple organs presents in young, low risk patients. *BMJ* 2020;**371**:m4470. doi:10.1136/bmj.m4470
- 5 Clift AK, Coupland CAC, Keogh RH, *et al*. Living risk prediction algorithm (QCOVID) for risk of hospital admission and mortality from coronavirus 19 in adults: national derivation and validation cohort study. *BMJ* 2020;**371**:m3731. doi:10.1136/bmj.m3731
- 6 Vasileiou E, Simpson CR, Shi T, *et al*. Interim findings from first-dose mass COVID-19 vaccination roll-out and COVID-19 hospital admissions in Scotland: a national prospective cohort study. *The Lancet* 2021;**397**:1646–57. doi:10.1016/S0140-6736(21)00677-2
- 7 Vasileiou E, Simpson CR, Robertson C, *et al*. Effectiveness of First Dose of COVID-19 Vaccines Against Hospital Admissions in Scotland: National Prospective Cohort Study of 5.4 Million People. Rochester, NY: : Social Science Research Network 2021. doi:10.2139/ssrn.3789264
- 8 Beigel JH, Tomashek KM, Dodd LE, *et al*. Remdesivir for the Treatment of Covid-19 — Final Report. *New England Journal of Medicine* Published Online First: 22 May 2020. doi:10.1056/NEJMoa2007764
- 9 Horby PW, Mafham M, Bell JL, *et al*. Lopinavir–ritonavir in patients admitted to hospital with COVID-19 (RECOVERY): a randomised, controlled, open-label, platform trial. *The Lancet* 2020;**396**:1345–52. doi:10.1016/S0140-6736(20)32013-4
- 10 RECOVERY Collaborative Group, Horby P, Lim WS, *et al*. Dexamethasone in Hospitalized Patients with Covid-19. *N Engl J Med* 2021;**384**:693–704. doi:10.1056/NEJMoa2021436
- 11 REMAP-CAP Investigators. Interleukin-6 Receptor Antagonists in Critically Ill Patients with Covid-19. *New England Journal of Medicine* 2021;**384**:1491–502. doi:10.1056/NEJMoa2100433
- 12 RECOVERY Collaborative Group, Horby PW, Pessoa-Amorim G, *et al*. Tocilizumab in patients admitted to hospital with COVID-19 (RECOVERY): preliminary results of a randomised, controlled, open-label, platform trial. *medRxiv* 2021;:2021.02.11.21249258. doi:10.1101/2021.02.11.21249258
- 13 Weinreich DM, Sivapalasingam S, Norton T, *et al*. REGN-COV2, a Neutralizing Antibody Cocktail, in Outpatients with Covid-19. *New England Journal of Medicine* 2021;**384**:238–51. doi:10.1056/NEJMoa2035002
- 14 RECOVERY Collaborative Group, Horby PW, Mafham M, *et al*. Casirivimab and imdevimab in patients admitted to hospital with COVID-19 (RECOVERY): a randomised, controlled, open-label, platform trial. *medRxiv* 2021;:2021.06.15.21258542. doi:10.1101/2021.06.15.21258542

- 1  
2  
3 15 Abaleke E, Abbas M, Abbasi S, *et al.* Azithromycin in patients admitted to hospital with COVID-19 (RECOVERY):  
4 a randomised, controlled, open-label, platform trial. *The Lancet* 2021;**397**:605–12. doi:10.1016/S0140-  
5 6736(21)00149-5  
6  
7 16 Monk PD, Marsden RJ, Tear VJ, *et al.* Safety and efficacy of inhaled nebulised interferon beta-1a (SNG001) for  
8 treatment of SARS-CoV-2 infection: a randomised, double-blind, placebo-controlled, phase 2 trial. *The Lancet*  
9 *Respiratory Medicine* 2021;**9**:196–206. doi:10.1016/S2213-2600(20)30511-7  
10  
11 17 Simonovich VA, Burgos Pratz LD, Scibona P, *et al.* A Randomized Trial of Convalescent Plasma in Covid-19  
12 Severe Pneumonia. *New England Journal of Medicine* 2021;**384**:619–29. doi:10.1056/NEJMoa2031304  
13  
14 18 National Institute for Health and Care Excellence. Recommendations | COVID-19 rapid guideline: managing  
15 COVID-19 | Guidance | NICE. <https://www.nice.org.uk/guidance/ng191/chapter/Recommendations> (accessed  
16 21 Jun 2021).  
17  
18 19 Prats-Urbe A, Sena AG, Lai LYH, *et al.* Use of repurposed and adjuvant drugs in hospital patients with covid-  
19 19: multinational network cohort study. *BMJ* 2021;**373**:n1038. doi:10.1136/bmj.n1038  
20  
21 20 Scottish Government. COVID-19 therapeutic alert: Dexamethasone in the treatment of COVID-19:  
22 implementation and management of supply for treatment in hospitals.  
23 <https://www.sehd.scot.nhs.uk/publications/DC20200616COVID-19Dexamethasone.pdf> (accessed 6 Aug  
24 2021).  
25  
26 21 NHS England. Coronavirus » Interim Clinical Commissioning Policy: Remdesivir for patients hospitalised with  
27 COVID-19 (adults and children 12 years and older).  
28 [https://www.england.nhs.uk/coronavirus/publication/interim-clinical-commissioning-policy-remdesivir-for-](https://www.england.nhs.uk/coronavirus/publication/interim-clinical-commissioning-policy-remdesivir-for-patients-hospitalised-with-covid-19-adults-and-children-12-years-and-older/)  
29 [patients-hospitalised-with-covid-19-adults-and-children-12-years-and-older/](https://www.england.nhs.uk/coronavirus/publication/interim-clinical-commissioning-policy-remdesivir-for-patients-hospitalised-with-covid-19-adults-and-children-12-years-and-older/) (accessed 23 Mar 2021).  
30  
31 22 NHS England. Coronavirus » Interim Clinical Commissioning Policy: Tocilizumab for hospitalised patients with  
32 COVID-19 pneumonia (adults). [https://www.england.nhs.uk/coronavirus/publication/interim-clinical-](https://www.england.nhs.uk/coronavirus/publication/interim-clinical-commissioning-policy-tocilizumab-for-hospitalised-patients-patients-with-covid-19-pneumonia-adults/)  
33 [commissioning-policy-tocilizumab-for-hospitalised-patients-patients-with-covid-19-pneumonia-adults/](https://www.england.nhs.uk/coronavirus/publication/interim-clinical-commissioning-policy-tocilizumab-for-hospitalised-patients-patients-with-covid-19-pneumonia-adults/)  
34 (accessed 23 Mar 2021).  
35  
36 23 Nuffield Department of Population Health. RECOVERY - Randomised Evaluation of COVID-19 Therapy.  
37 2021.<https://www.recoverytrial.net/> (accessed 8 Jun 2021).  
38  
39 24 Simpson CR, Robertson C, Vasileiou E, *et al.* Early Pandemic Evaluation and Enhanced Surveillance of COVID-19  
40 (EAVE II): protocol for an observational study using linked Scottish national data. *BMJ Open* 2020;**10**:e039097.  
41 doi:10.1136/bmjopen-2020-039097  
42  
43 25 Warren LR, Clarke J, Arora S, *et al.* Improving data sharing between acute hospitals in England: an overview of  
44 health record system distribution and retrospective observational analysis of inter-hospital transitions of care.  
45 *BMJ Open* 2019;**9**:e031637. doi:10.1136/bmjopen-2019-031637  
46  
47 26 NHS Scotland. HEPMA | eHealth. <https://www.ehealth.scot/case-studies/hepma/> (accessed 8 Jun 2021).  
48  
49 27 Scottish Government. eHealth Strategy 2014-2017. Edinburgh, UK: : Scottish Government 2015.  
50 <https://www.gov.scot/publications/ehealth-strategy-2014-2017/> (accessed 15 Oct 2020).  
51  
52 28 NHS Scotland. Organisations – Scotland’s Health on the Web. 2020.<https://www.scot.nhs.uk/organisations/>  
53 (accessed 8 Jun 2021).  
54  
55  
56  
57  
58  
59  
60

- 1  
2  
3 29 NHS Digital. Rule logic. NHS Digital. <https://digital.nhs.uk/coronavirus/shielded-patient-list/methodology/rule-logic> (accessed 7 Jun 2021).  
4  
5  
6 30 Public Health Scotland. Population Estimates - Scottish Health and Social Care Open Data. 2021. <https://www.opendata.nhs.scot/dataset/population-estimates> (accessed 14 Jun 2021).  
7  
8  
9 31 Information Services Division. Data Dictionary A-Z: CHI number. ISD Scotland Data Dictionary. <https://www.ndc.scot.nhs.uk/Dictionary-A-Z/Definitions/index.asp?ID=128&Title=CHI%20Number> (accessed 15 Oct 2020).  
10  
11  
12  
13 32 Health Protection Scotland. Data and surveillance. <https://www.hps.scot.nhs.uk/data/> (accessed 8 Jun 2021).  
14  
15 33 NHS Education for Scotland. Turas Vaccination Management tool. 2021. <https://learn.nes.nhs.scot/42708/turas-vaccination-management-tool> (accessed 8 Jun 2021).  
16  
17  
18 34 Information Services Division. National Data Catalogue: National Datasets. ISD Scotland National Data Catalogue. <https://www.ndc.scot.nhs.uk/National-Datasets/index.asp> (accessed 15 Oct 2020).  
19  
20  
21 35 NHS Digital. Hospital Electronic Prescribing and Medicines Administration (HEPMA) Data - Scotland. NHS Digital. <https://digital.nhs.uk/about-nhs-digital/corporate-information-and-documents/directions-and-data-provision-notice/data-provision-notice-dpns/electronic-prescribing-and-medicines-administration-data-scotland> (accessed 8 Jun 2021).  
22  
23  
24  
25  
26 36 University of Edinburgh. EAVE II. The University of Edinburgh. <https://www.ed.ac.uk/usher/eave-ii> (accessed 8 Jun 2021).  
27  
28  
29 37 Scottish Government. The Scottish Index of Multiple Deprivation. Statistics. 2020. <https://www2.gov.scot/SIMD> (accessed 15 Oct 2020).  
30  
31  
32 38 Quan H, Sundararajan V, Halfon P, *et al*. Coding algorithms for defining comorbidities in ICD-9-CM and ICD-10 administrative data. *Med Care* 2005;**43**:1130–9. doi:10.1097/01.mlr.0000182534.19832.83  
33  
34  
35 39 R Core Team. *R: A language and environment for statistical computing*. Vienna, Austria: : R Foundation for Statistical Computing 2020. <https://www.R-project.org/>  
36  
37  
38 40 RStudio Team. *RStudio: Integrated Development for R*. Boston, MA: : RStudio, PBC 2020. <http://www.rstudio.com/>  
39  
40  
41 41 Elm E von, Altman DG, Egger M, *et al*. Strengthening the reporting of observational studies in epidemiology (STROBE) statement: guidelines for reporting observational studies. *BMJ* 2007;**335**:806–8. doi:10.1136/bmj.39335.541782.AD  
42  
43  
44  
45  
46  
47  
48  
49  
50  
51  
52  
53  
54  
55  
56  
57  
58  
59  
60

# Reporting checklist for cohort study.

Based on the STROBE cohort guidelines.

## Instructions to authors

Complete this checklist by entering the page numbers from your manuscript where readers will find each of the items listed below.

Your article may not currently address all the items on the checklist. Please modify your text to include the missing information. If you are certain that an item does not apply, please write "n/a" and provide a short explanation.

Upload your completed checklist as an extra file when you submit to a journal.

In your methods section, say that you used the STROBE cohort reporting guidelines, and cite them as:

von Elm E, Altman DG, Egger M, Pocock SJ, Gøtzsche PC, Vandenbroucke JP. The Strengthening the Reporting of Observational Studies in Epidemiology (STROBE) Statement: guidelines for reporting observational studies.

|                           |                     |                                                                                    | Page   |
|---------------------------|---------------------|------------------------------------------------------------------------------------|--------|
|                           |                     | Reporting Item                                                                     | Number |
| <b>Title and abstract</b> |                     |                                                                                    |        |
| Title                     | <a href="#">#1a</a> | Indicate the study's design with a commonly used term in the title or the abstract | 0,1    |
| Abstract                  | <a href="#">#1b</a> | Provide in the abstract an informative and balanced summary                        | 1      |

of what was done and what was found

## Introduction

Background / [#2](#) Explain the scientific background and rationale for the 3,4  
 rationale investigation being reported

Objectives [#3](#) State specific objectives, including any prespecified 5  
 hypotheses

## Methods

Study design [#4](#) Present key elements of study design early in the paper 5,6

Setting [#5](#) Describe the setting, locations, and relevant dates, including 5,6  
 periods of recruitment, exposure, follow-up, and data collection

Eligibility criteria [#6a](#) Give the eligibility criteria, and the sources and methods of 7  
 selection of participants. Describe methods of follow-up.

Eligibility criteria [#6b](#) For matched studies, give matching criteria and number of n/a  
 exposed and unexposed

Variables [#7](#) Clearly define all outcomes, exposures, predictors, potential 7,8,9;  
 confounders, and effect modifiers. Give diagnostic criteria, if table 1  
 applicable

Data sources / [#8](#) For each variable of interest give sources of data and details of 6; table  
 measurement methods of assessment (measurement). Describe 1  
 comparability of assessment methods if there is more than one  
 group. Give information separately for for exposed and  
 unexposed groups if applicable.

|    |                |                      |                                                                   |     |
|----|----------------|----------------------|-------------------------------------------------------------------|-----|
| 1  | Bias           | <a href="#">#9</a>   | Describe any efforts to address potential sources of bias         | n/a |
| 2  |                |                      |                                                                   |     |
| 3  |                |                      |                                                                   |     |
| 4  | Study size     | <a href="#">#10</a>  | Explain how the study size was arrived at                         | n/a |
| 5  |                |                      |                                                                   |     |
| 6  |                |                      |                                                                   |     |
| 7  | Quantitative   | <a href="#">#11</a>  | Explain how quantitative variables were handled in the            | n/a |
| 8  | variables      |                      | analyses. If applicable, describe which groupings were chosen,    |     |
| 9  |                |                      | and why                                                           |     |
| 10 |                |                      |                                                                   |     |
| 11 |                |                      |                                                                   |     |
| 12 |                |                      |                                                                   |     |
| 13 |                |                      |                                                                   |     |
| 14 |                |                      |                                                                   |     |
| 15 | Statistical    | <a href="#">#12a</a> | Describe all statistical methods, including those used to control |     |
| 16 | methods        |                      | for confounding                                                   |     |
| 17 |                |                      |                                                                   |     |
| 18 |                |                      |                                                                   |     |
| 19 |                |                      |                                                                   |     |
| 20 | 9              |                      |                                                                   |     |
| 21 |                |                      |                                                                   |     |
| 22 |                |                      |                                                                   |     |
| 23 | Statistical    | <a href="#">#12b</a> | Describe any methods used to examine subgroups and                | n/a |
| 24 | methods        |                      | interactions                                                      |     |
| 25 |                |                      |                                                                   |     |
| 26 |                |                      |                                                                   |     |
| 27 |                |                      |                                                                   |     |
| 28 |                |                      |                                                                   |     |
| 29 | Statistical    | <a href="#">#12c</a> | Explain how missing data were addressed                           | n/a |
| 30 | methods        |                      |                                                                   |     |
| 31 |                |                      |                                                                   |     |
| 32 |                |                      |                                                                   |     |
| 33 |                |                      |                                                                   |     |
| 34 | Statistical    | <a href="#">#12d</a> | If applicable, explain how loss to follow-up was addressed        | n/a |
| 35 | methods        |                      |                                                                   |     |
| 36 |                |                      |                                                                   |     |
| 37 |                |                      |                                                                   |     |
| 38 |                |                      |                                                                   |     |
| 39 | Statistical    | <a href="#">#12e</a> | Describe any sensitivity analyses                                 |     |
| 40 | methods        |                      |                                                                   |     |
| 41 |                |                      |                                                                   |     |
| 42 |                |                      |                                                                   |     |
| 43 |                |                      |                                                                   |     |
| 44 |                |                      |                                                                   |     |
| 45 | n/a            |                      |                                                                   |     |
| 46 |                |                      |                                                                   |     |
| 47 |                |                      |                                                                   |     |
| 48 | <b>Results</b> |                      |                                                                   |     |
| 49 |                |                      |                                                                   |     |
| 50 |                |                      |                                                                   |     |
| 51 | Participants   | <a href="#">#13a</a> | Report numbers of individuals at each stage of study—eg           | n/a |
| 52 |                |                      | numbers potentially eligible, examined for eligibility, confirmed |     |
| 53 |                |                      | eligible, included in the study, completing follow-up, and        |     |
| 54 |                |                      | analysed. Give information separately for for exposed and         |     |
| 55 |                |                      |                                                                   |     |
| 56 |                |                      |                                                                   |     |
| 57 |                |                      |                                                                   |     |
| 58 |                |                      |                                                                   |     |
| 59 |                |                      |                                                                   |     |
| 60 |                |                      |                                                                   |     |

unexposed groups if applicable.

|    |                  |                      |                                                               |
|----|------------------|----------------------|---------------------------------------------------------------|
| 1  |                  |                      |                                                               |
| 2  |                  |                      |                                                               |
| 3  |                  |                      |                                                               |
| 4  | Participants     | <a href="#">#13b</a> | Give reasons for non-participation at each stage              |
| 5  |                  |                      |                                                               |
| 6  |                  |                      |                                                               |
| 7  | Participants     | <a href="#">#13c</a> | Consider use of a flow diagram                                |
| 8  |                  |                      |                                                               |
| 9  |                  |                      |                                                               |
| 10 | n/a              |                      |                                                               |
| 11 |                  |                      |                                                               |
| 12 |                  |                      |                                                               |
| 13 | Descriptive data | <a href="#">#14a</a> | Give characteristics of study participants (eg demographic,   |
| 14 |                  |                      |                                                               |
| 15 |                  |                      | clinical, social) and information on exposures and potential  |
| 16 |                  |                      | confounders. Give information separately for exposed and      |
| 17 |                  |                      | unexposed groups if applicable.                               |
| 18 |                  |                      |                                                               |
| 19 |                  |                      |                                                               |
| 20 |                  |                      |                                                               |
| 21 |                  |                      |                                                               |
| 22 |                  |                      |                                                               |
| 23 | Descriptive data | <a href="#">#14b</a> | Indicate number of participants with missing data for each    |
| 24 |                  |                      |                                                               |
| 25 |                  |                      | variable of interest                                          |
| 26 |                  |                      |                                                               |
| 27 |                  |                      |                                                               |
| 28 | n/a              |                      |                                                               |
| 29 |                  |                      |                                                               |
| 30 |                  |                      |                                                               |
| 31 | Descriptive data | <a href="#">#14c</a> | Summarise follow-up time (eg, average and total amount)       |
| 32 |                  |                      |                                                               |
| 33 |                  |                      |                                                               |
| 34 | n/a              |                      |                                                               |
| 35 |                  |                      |                                                               |
| 36 |                  |                      |                                                               |
| 37 | Outcome data     | <a href="#">#15</a>  | Report numbers of outcome events or summary measures          |
| 38 |                  |                      |                                                               |
| 39 |                  |                      | over time. Give information separately for exposed and        |
| 40 |                  |                      | unexposed groups if applicable.                               |
| 41 |                  |                      |                                                               |
| 42 |                  |                      |                                                               |
| 43 |                  |                      |                                                               |
| 44 |                  |                      |                                                               |
| 45 | n/a              |                      |                                                               |
| 46 |                  |                      |                                                               |
| 47 |                  |                      |                                                               |
| 48 | Main results     | <a href="#">#16a</a> | Give unadjusted estimates and, if applicable, confounder-     |
| 49 |                  |                      |                                                               |
| 50 |                  |                      | adjusted estimates and their precision (eg, 95% confidence    |
| 51 |                  |                      | interval). Make clear which confounders were adjusted for and |
| 52 |                  |                      | why they were included                                        |
| 53 |                  |                      |                                                               |
| 54 |                  |                      |                                                               |
| 55 |                  |                      |                                                               |
| 56 |                  |                      |                                                               |
| 57 |                  |                      |                                                               |
| 58 | Main results     | <a href="#">#16b</a> | Report category boundaries when continuous variables were     |
| 59 |                  |                      |                                                               |
| 60 |                  |                      |                                                               |

1 categorized

2  
3  
4 Main results

[#16c](#)

If relevant, consider translating estimates of relative risk into absolute risk for a meaningful time period

5  
6  
7  
8  
9 n/a

10  
11  
12 Other analyses

[#17](#)

Report other analyses done—eg analyses of subgroups and interactions, and sensitivity analyses

n/a

13  
14  
15  
16  
17 **Discussion**

18  
19  
20 Key results

[#18](#)

Summarise key results with reference to study objectives

n/a

21  
22  
23 Limitations

[#19](#)

Discuss limitations of the study, taking into account sources of potential bias or imprecision. Discuss both direction and magnitude of any potential bias.

n/a

24  
25  
26  
27  
28  
29  
30 Interpretation

[#20](#)

Give a cautious overall interpretation considering objectives, limitations, multiplicity of analyses, results from similar studies, and other relevant evidence.

n/a

31  
32  
33  
34  
35  
36  
37  
38 Generalisability

[#21](#)

Discuss the generalisability (external validity) of the study results

n/a

39  
40  
41  
42  
43 **Other Information**

44  
45  
46  
47 Funding

[#22](#)

Give the source of funding and the role of the funders for the present study and, if applicable, for the original study on which the present article is based

12

48  
49  
50  
51  
52  
53  
54 Notes:

- 55  
56  
57  
58 • 7: 7,8,9; table 1



- 1 • 8: 6; table 1 The STROBE checklist is distributed under the terms of the Creative Commons  
2  
3 Attribution License CC-BY. This checklist was completed on 18. June 2021 using  
4  
5 <https://www.goodreports.org/>, a tool made by the [EQUATOR Network](#) in collaboration with  
6  
7 [Penelope.ai](#)  
8  
9  
10  
11  
12  
13  
14  
15  
16  
17  
18  
19  
20  
21  
22  
23  
24  
25  
26  
27  
28  
29  
30  
31  
32  
33  
34  
35  
36  
37  
38  
39  
40  
41  
42  
43  
44  
45  
46  
47  
48  
49  
50  
51  
52  
53  
54  
55  
56  
57  
58  
59  
60

For peer review only
